# Supplementary material for: Elaboration of the Effective Multi-Target Therapeutic Platform for the Treatment of Alzheimer’s Disease Based on Novel Monoterpene-Derived Hydroxamic Acids
Source: MDPI journal article supplement (doi:10.3390/ijms24119743), 2023-06-04
Supplement: s1 [file s1]

# **Elaboration of the Effective Multi-Target Therapeutic Platform for the Treatment of Alzheimer's Disease Based on Novel Monoterpene-Derived Hydroxamic Acids**

**Yulia Aleksandrova<sup>1</sup>, Aldar Munkuev<sup>2</sup>, Evgenii Mozhaitsev<sup>2</sup>, Evgenii Suslov<sup>2</sup>, Dmitry Tsypyshev<sup>2</sup>, Kirill Chaprov<sup>1</sup>, Roman Begunov<sup>3</sup>, Konstantin Volcho<sup>2</sup>, Nariman Salakhutdinov<sup>2</sup> and Margarita Neganova<sup>1,\*</sup>**

<sup>1</sup> Institute of Physiologically Active Compounds at Federal Research Center of Problems of Chemical Physics and Medicinal Chemistry, Russian Academy of Sciences, Severnij Pr. 1, Chernogolovka 142432, Russia

<sup>2</sup> Department of Medicinal Chemistry, N. N. Vorozhtsov Novosibirsk Institute of Organic Chemistry, Siberian Branch, Russian Academy of Sciences, Lavrentiev Ave., 9, Novosibirsk 630090, Russia

<sup>3</sup> P. G. Demidov Yaroslavl State University, Matrosova Ave., 9, Yaroslavl 150003, Russia

\* Correspondence: neganovam@ipac.ac.ru; Tel.: +7-(962)-937-68-69

$^1\text{H}$  NMR spectrum of compound 5

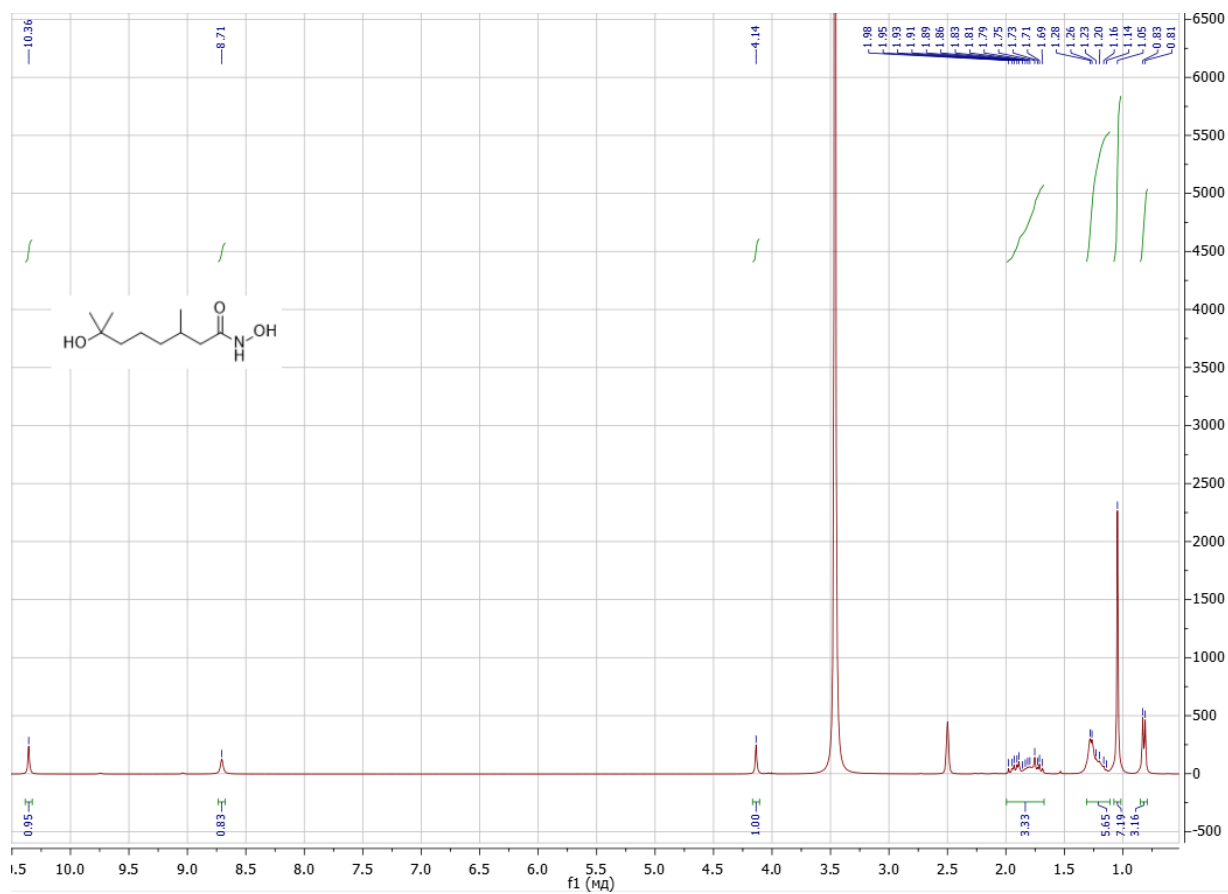

$^{13}\text{C}$  NMR spectrum of compound 5

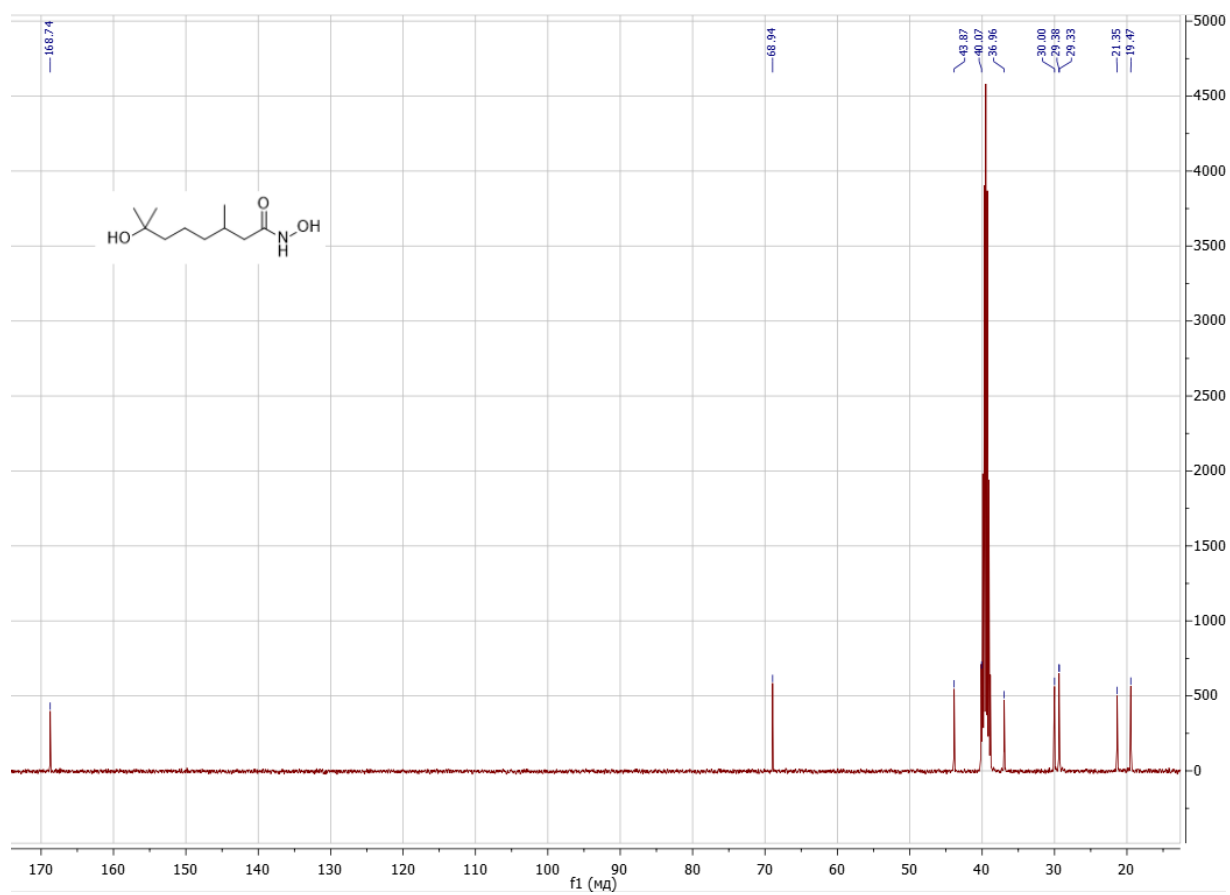

## Mass-spectrum of compound 5

MS-315 #13 RT: 0.82 AV: 1 NL: 8.79E7

T: + c EI Full ms [ 14.50-220.50]

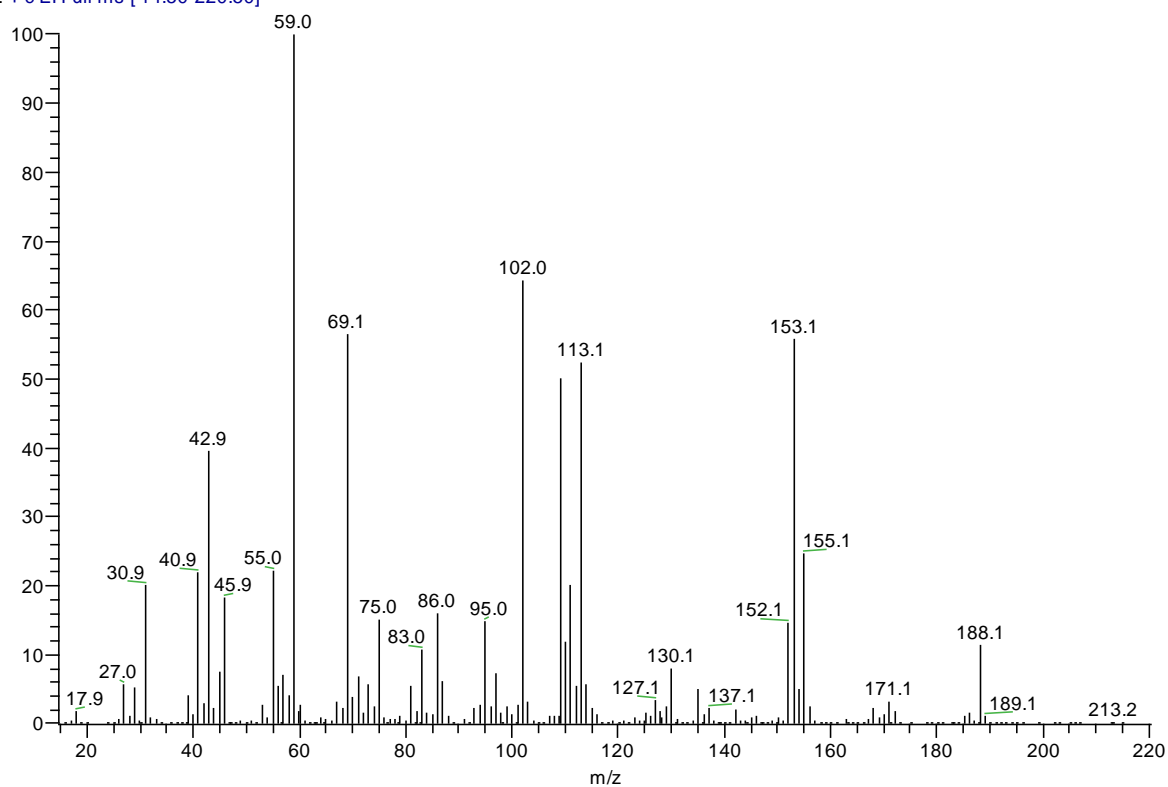

## <sup>1</sup>H NMR spectrum of compound 8

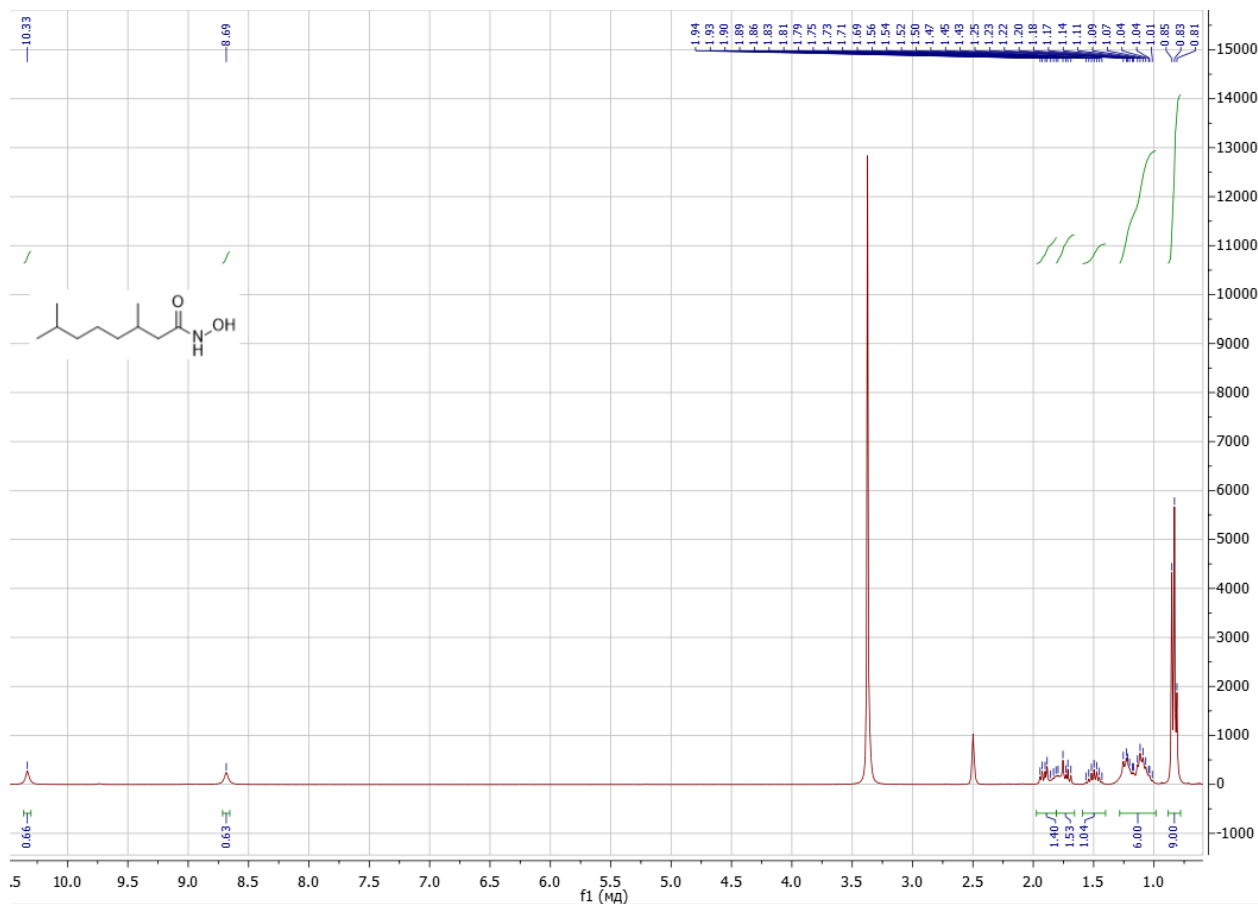

# <sup>13</sup>C NMR spectrum of compound **8**

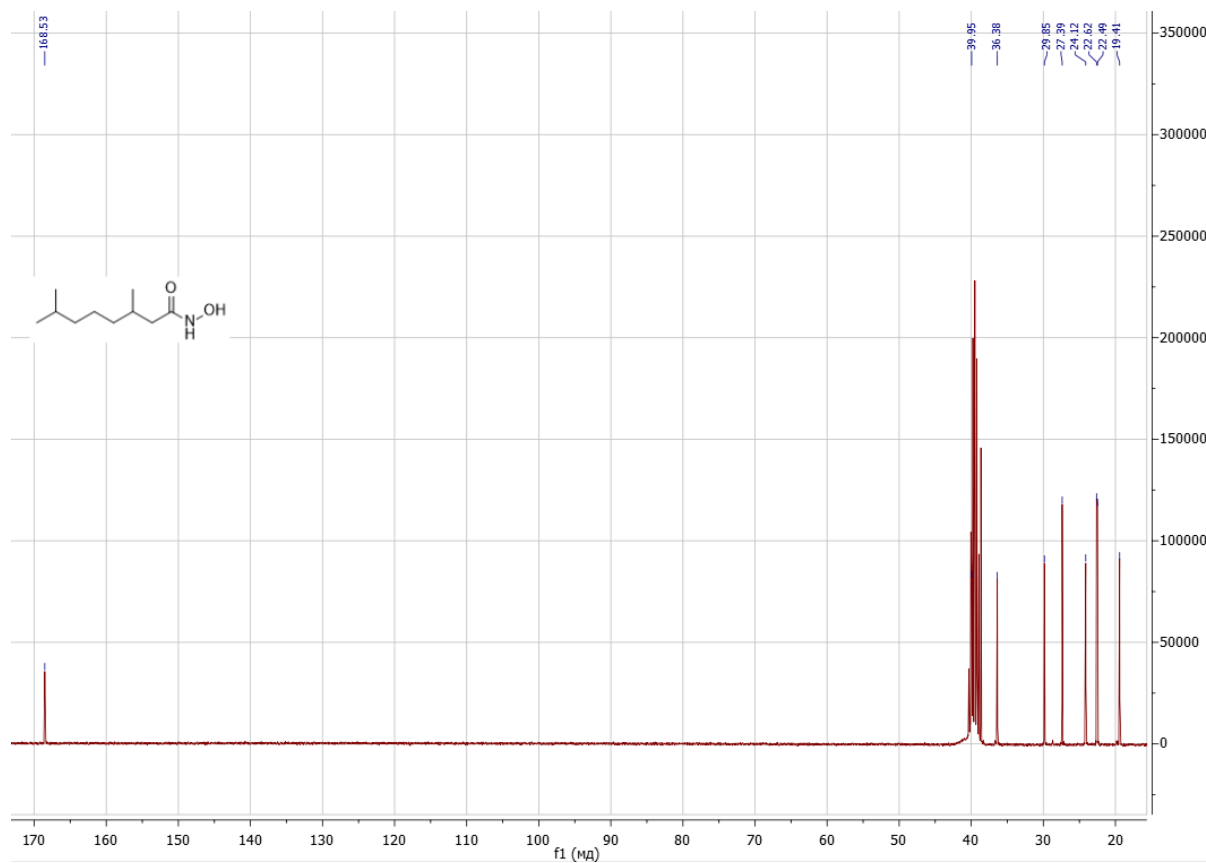

# Mass-spectrum of compound **8**

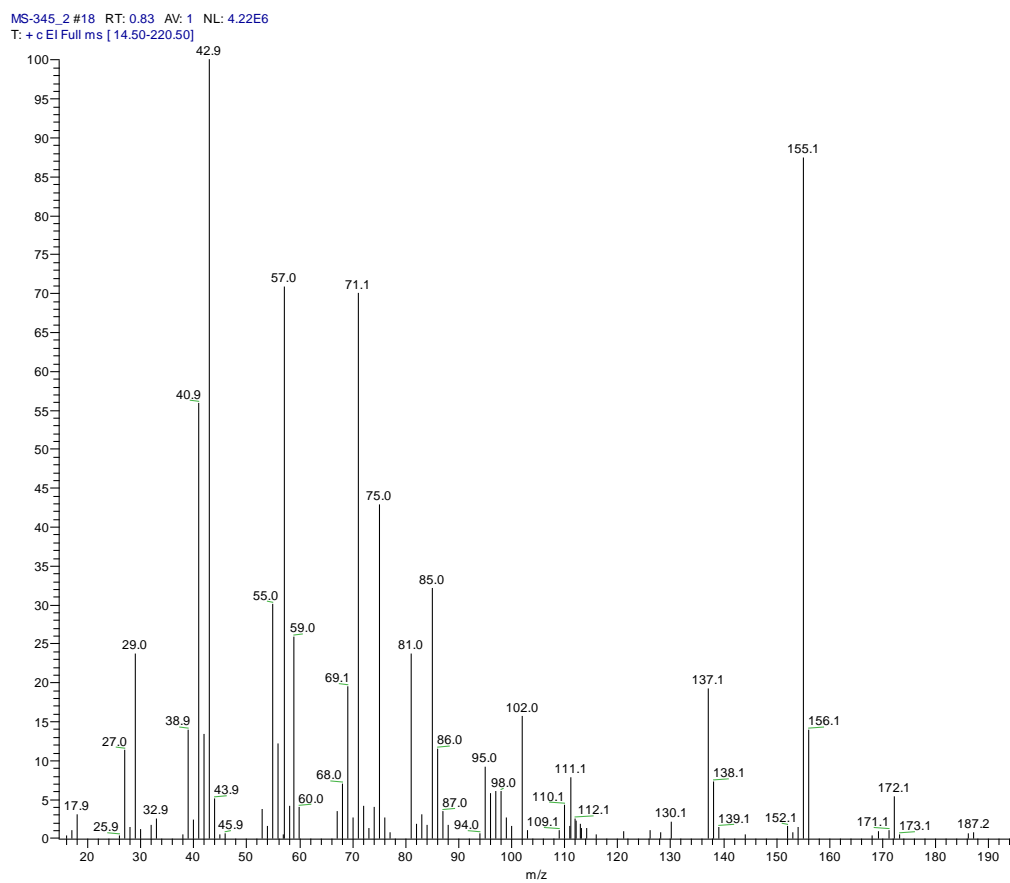

<sup>1</sup>H NMR spectrum of compound **10**

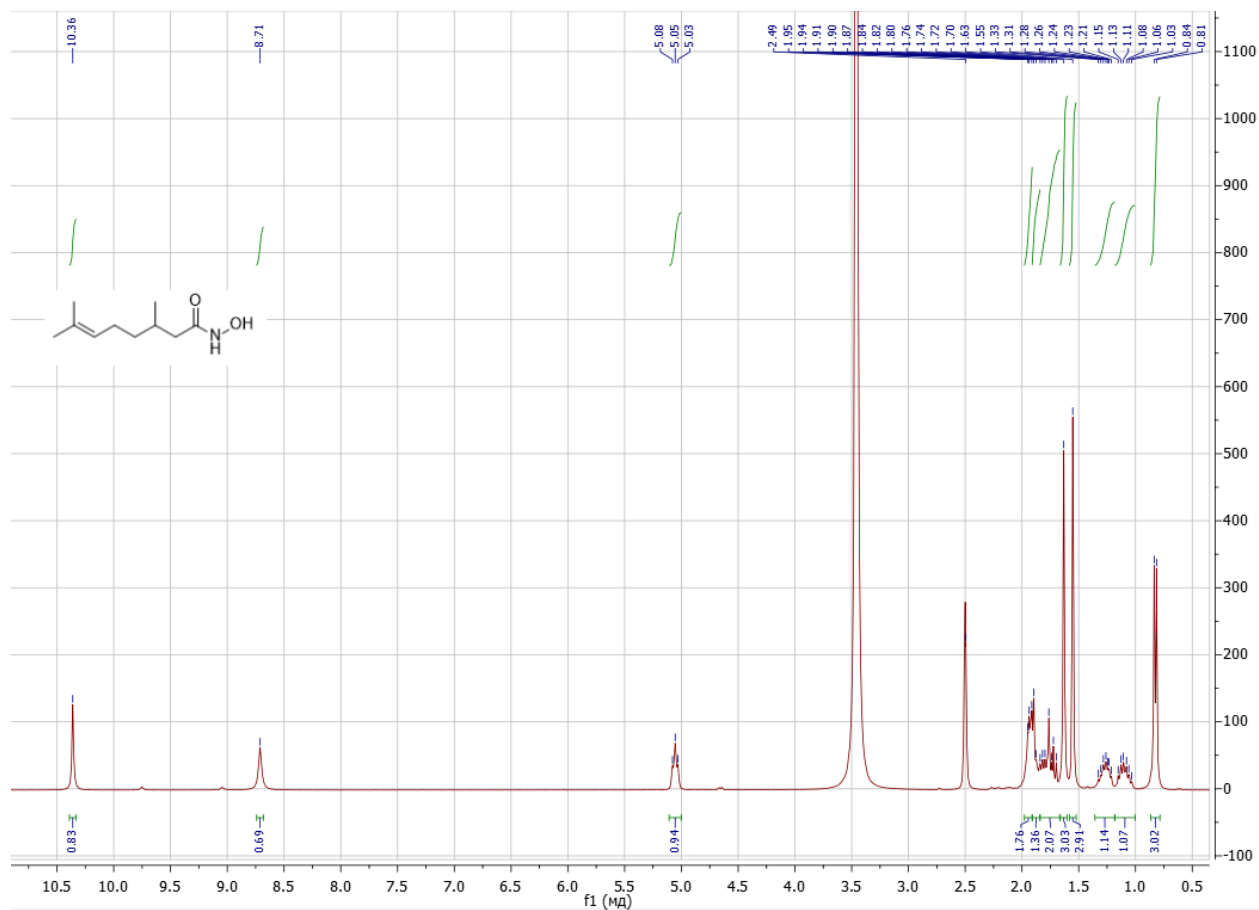

<sup>13</sup>C NMR spectrum of compound **10**

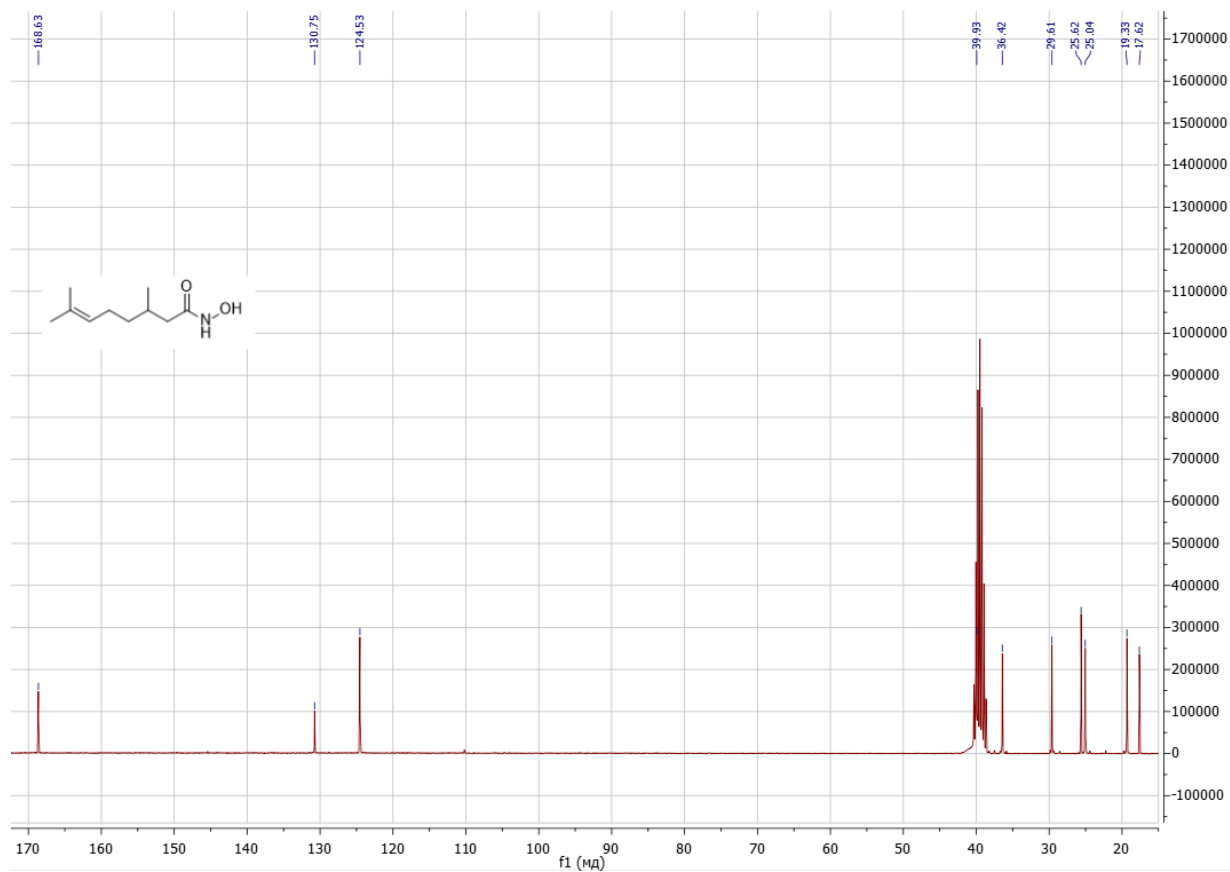

## Mass-spectrum of compound **10**

MS-329\_200507184822 #13 RT: 0.76 AV: 1 NL: 5.00E6  
T: + c EI Full ms [ 14.50-220.50]

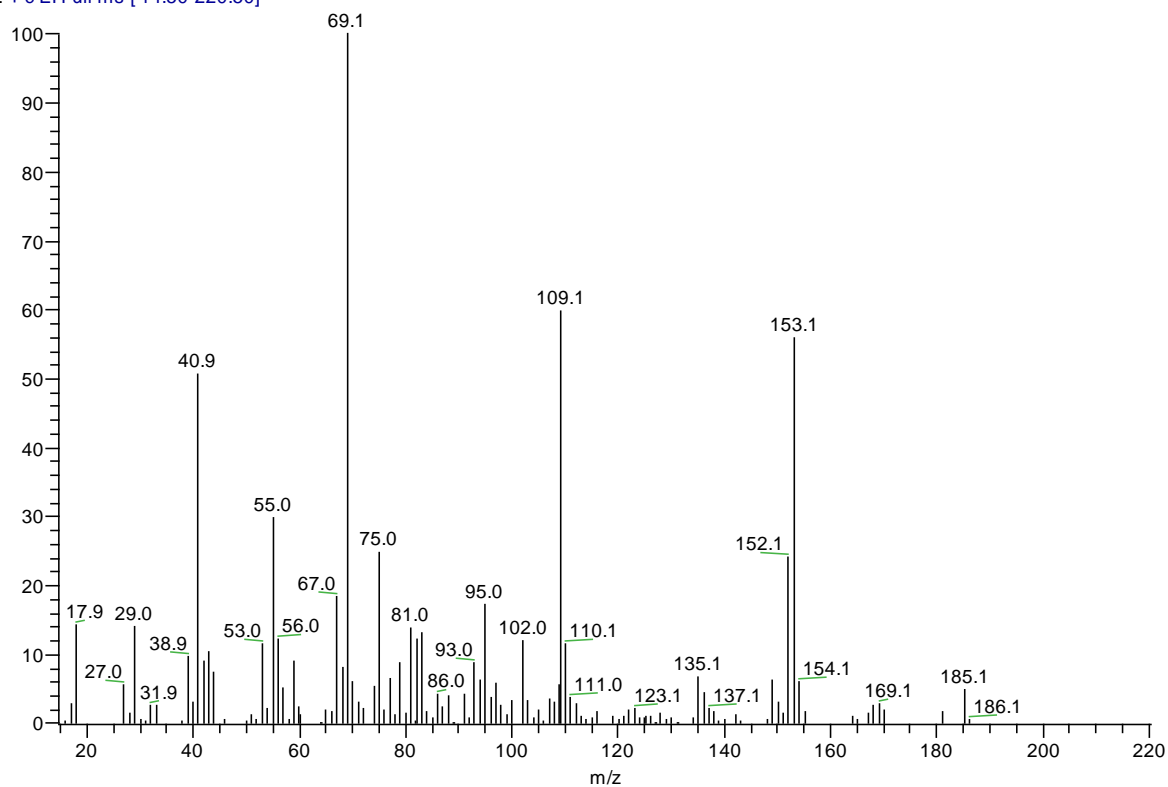

## <sup>1</sup>H NMR spectrum of compound (+)-**13**

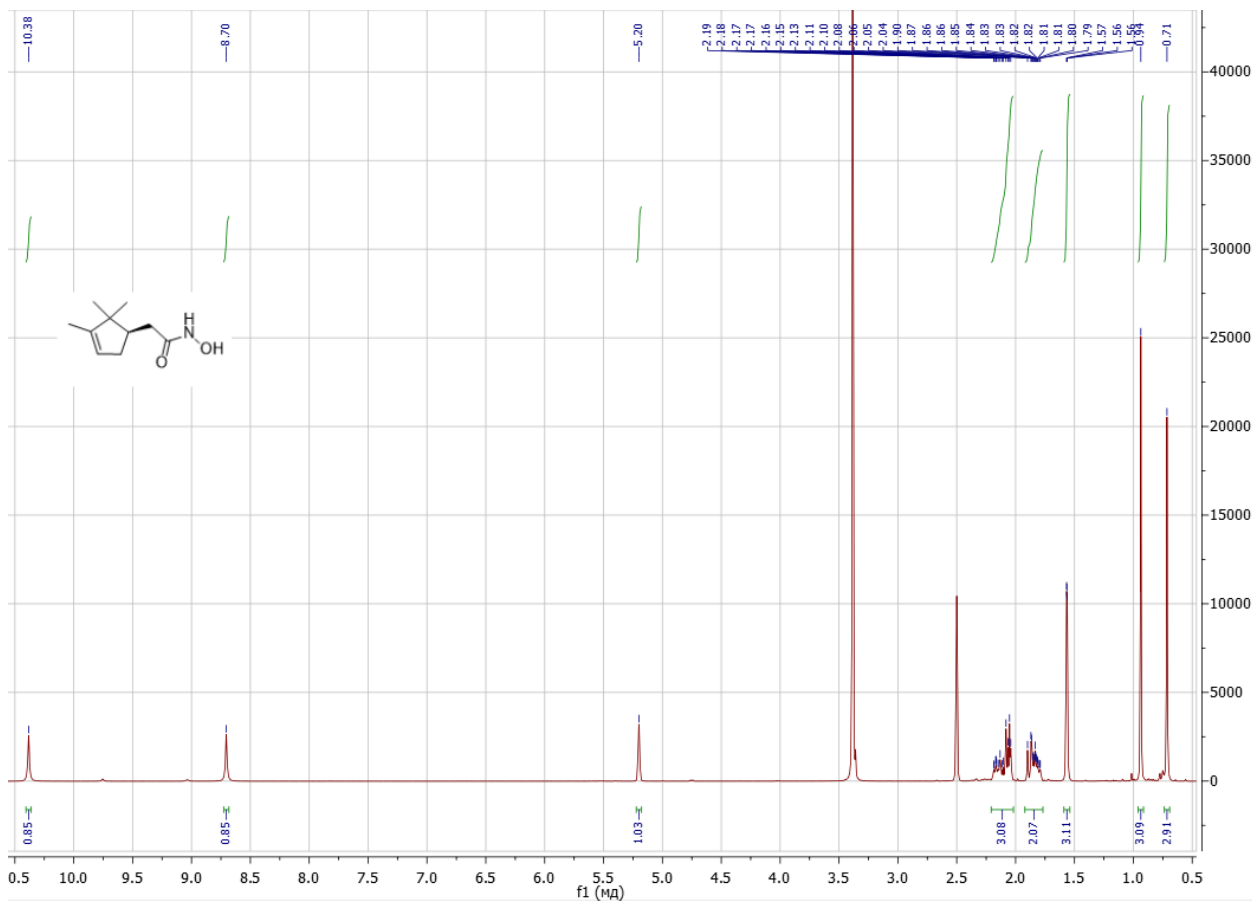

### $^{13}\text{C}$ NMR spectrum of compound (+)-13

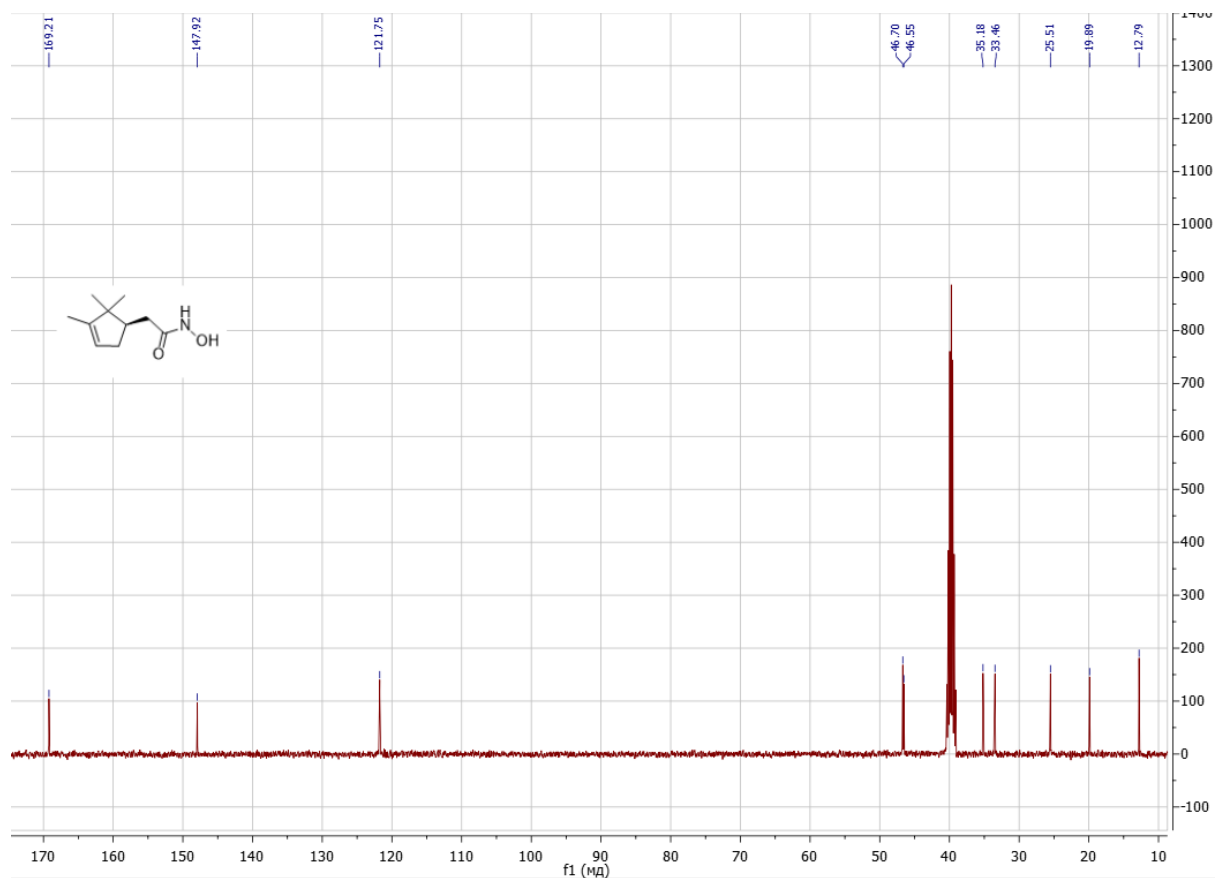

### Mass-spectrum of compound (+)-13

Ms-369 #10 RT: 0.57 AV: 1 NL: 2.01E6  
T: + c EI Full ms [ 14.50-220.50]

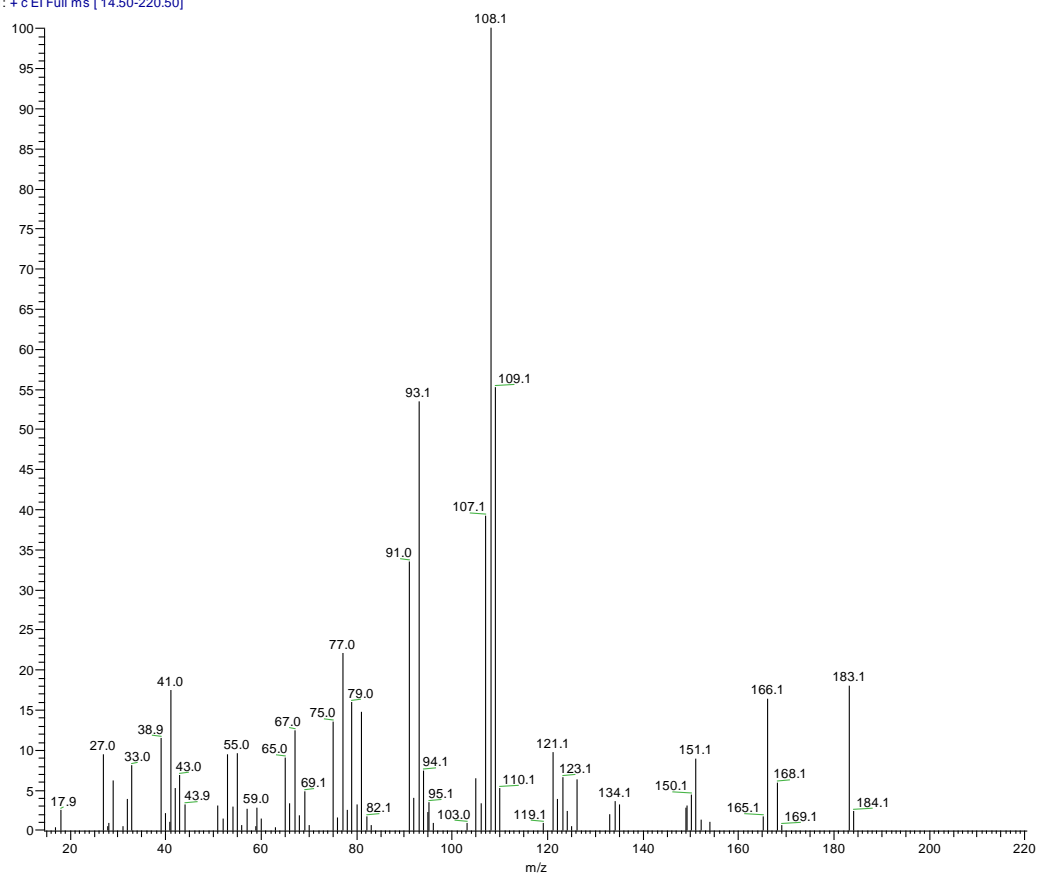

<sup>1</sup>H NMR spectrum of compound **16**

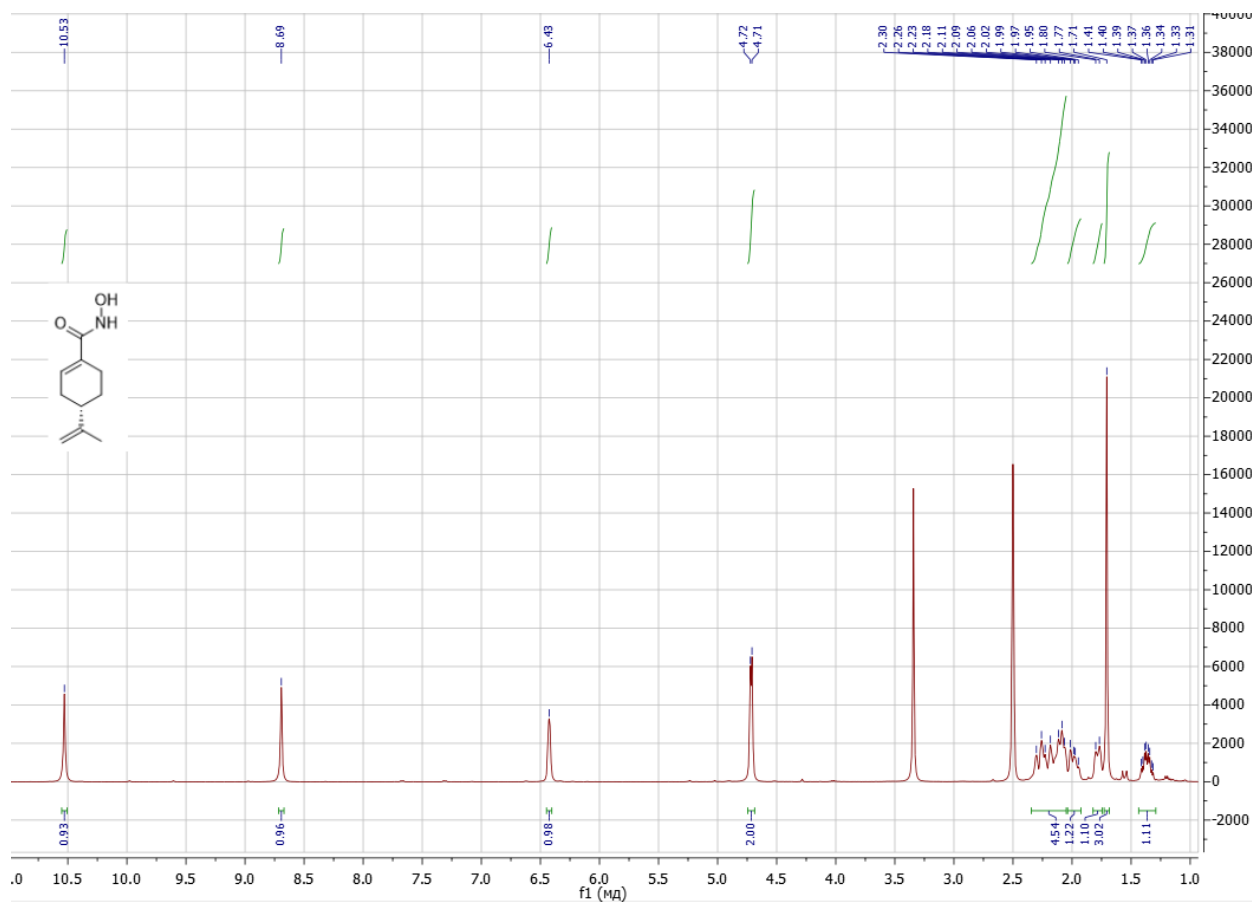

<sup>13</sup>C NMR spectrum of compound **16**

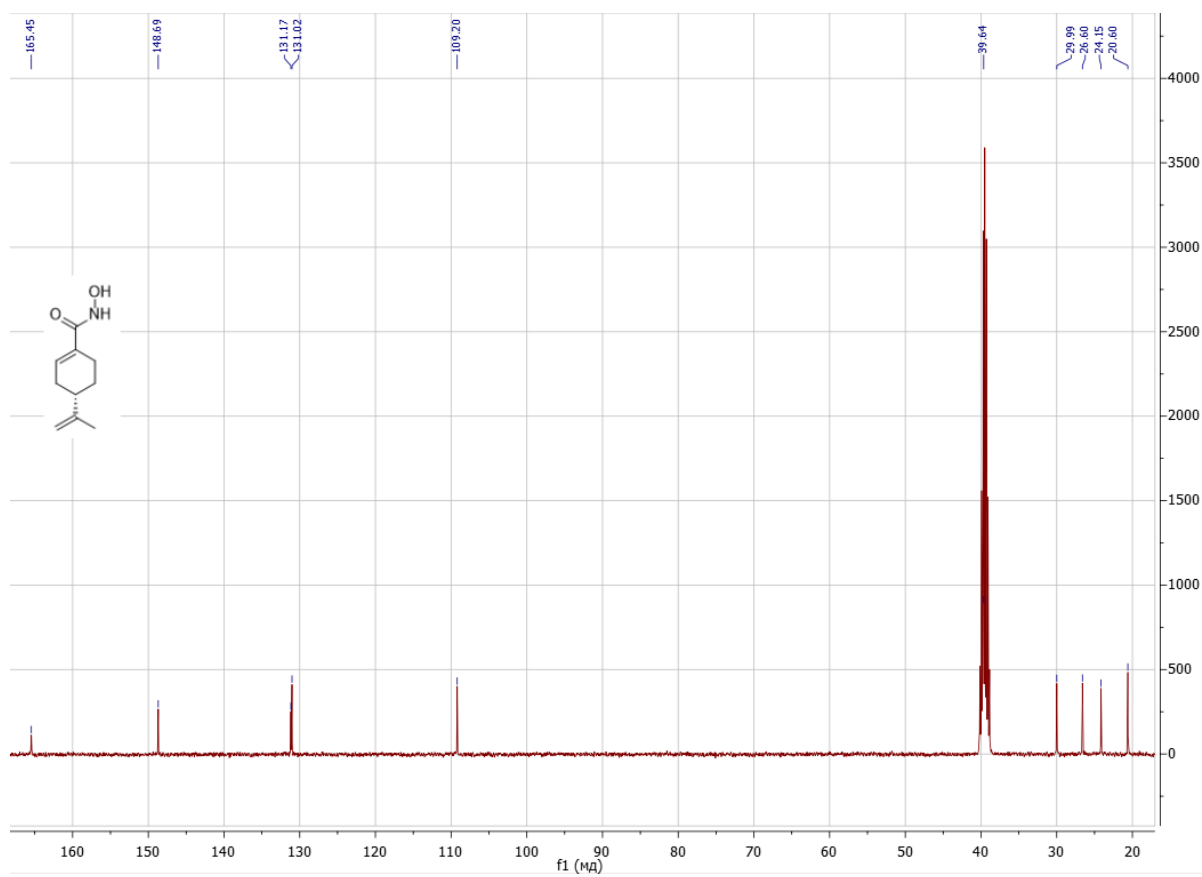

## Mass-spectrum of compound **16**

MS-333\_pm #2 RT: 0.07 AV: 1 NL: 2.87E6  
T: + c EI Full ms [ 14.50-220.50]

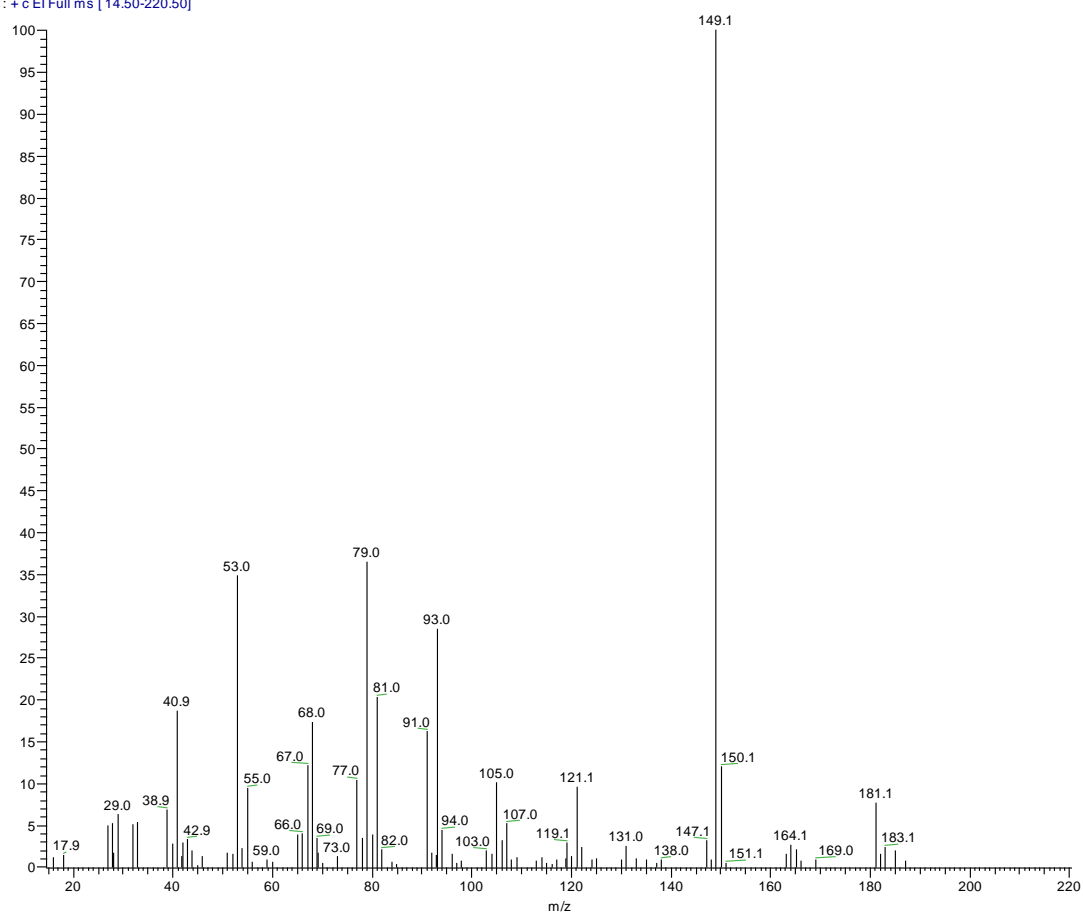

## $^1\text{H}$ NMR spectrum of compound (-)-**19**

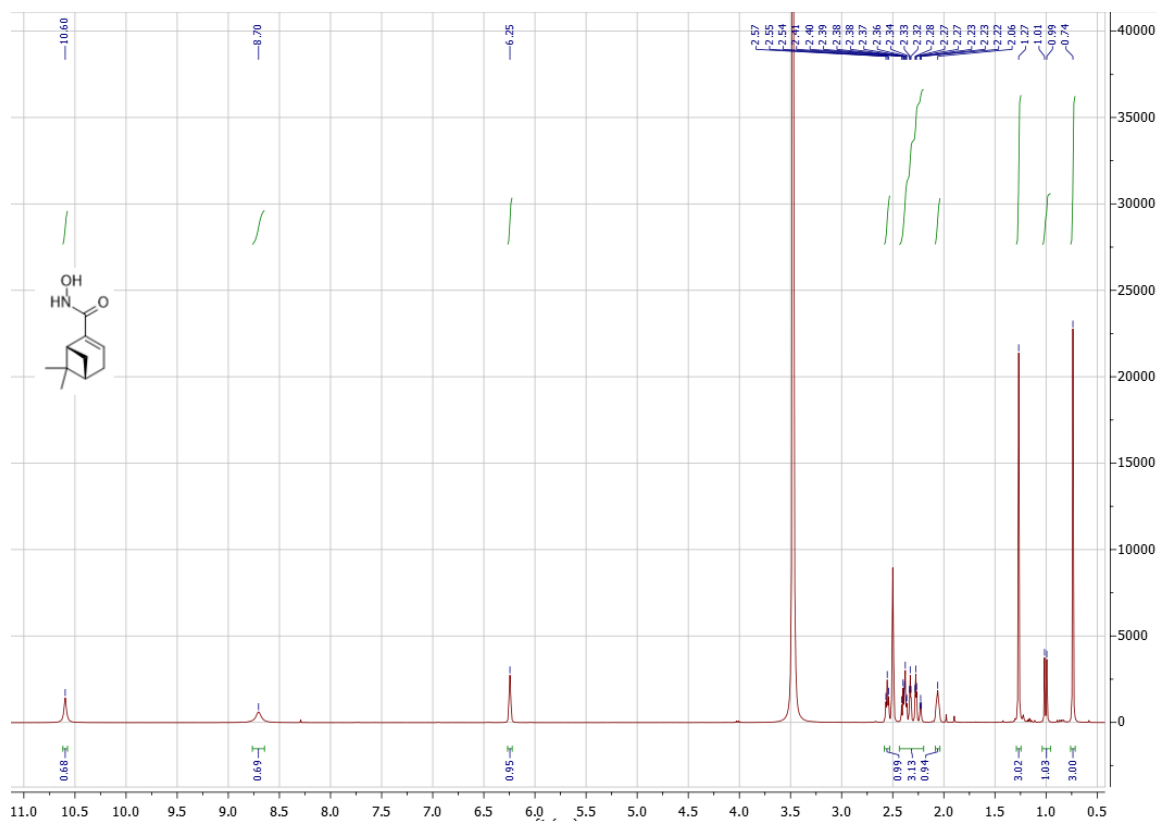

<sup>13</sup>C NMR spectrum of compound (-)-**19**

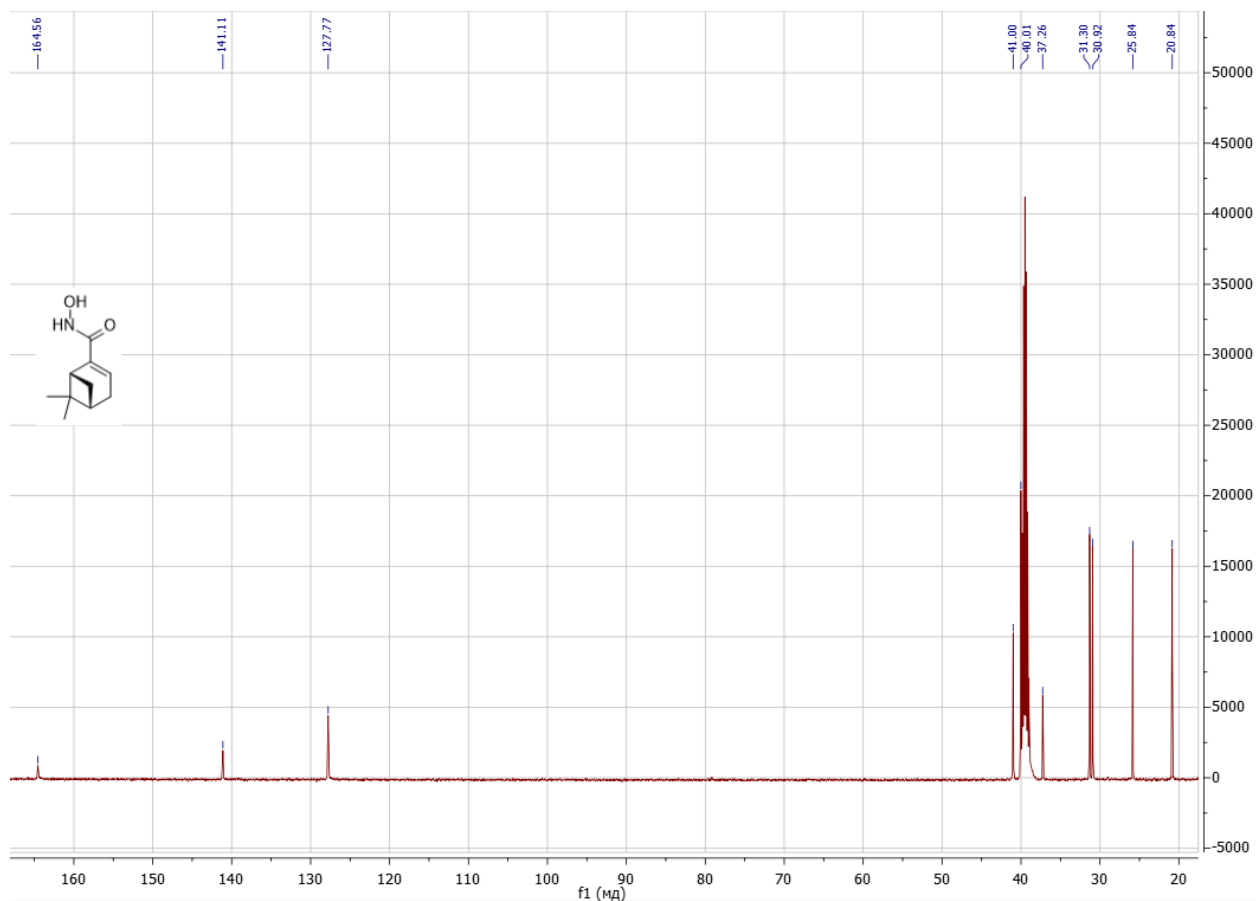

Mass-spectrum of compound (-)-**19**

MS-316 #3 RT: 0.13 AV: 1 NL: 1.66E6  
T: + c EI Full ms [ 14.50-220.50]

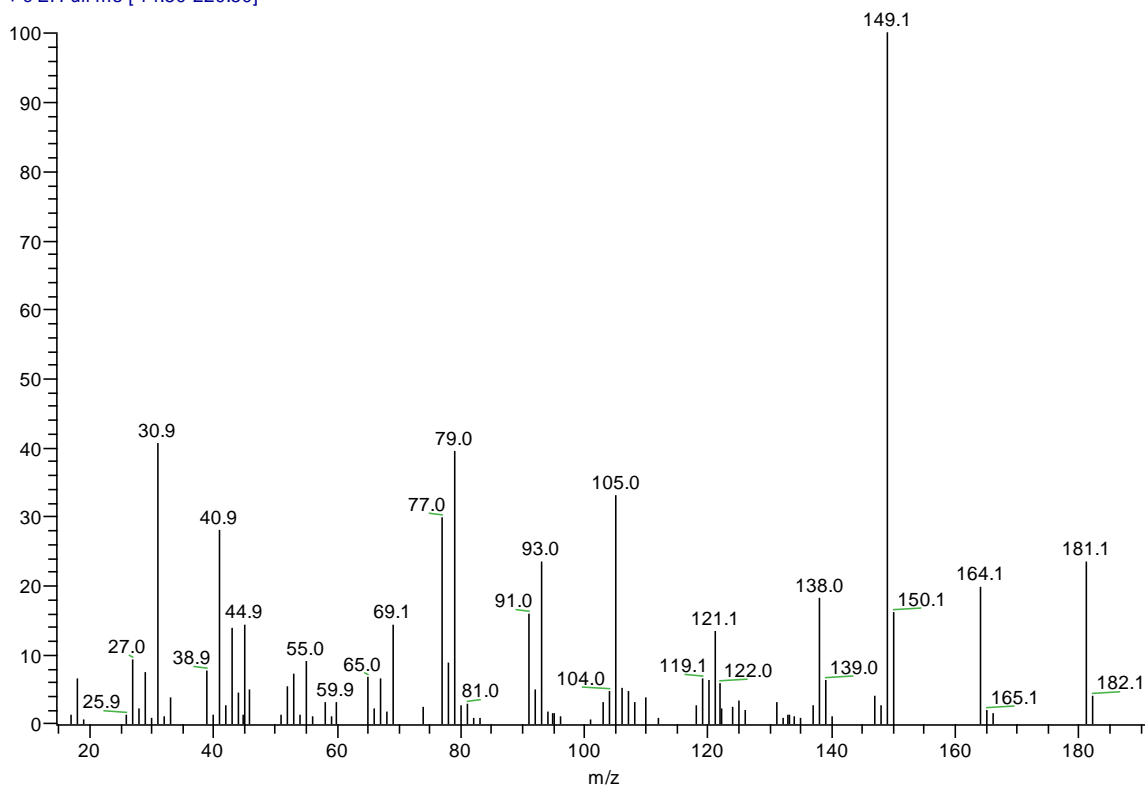

$^1\text{H}$  NMR spectrum of compound **30**

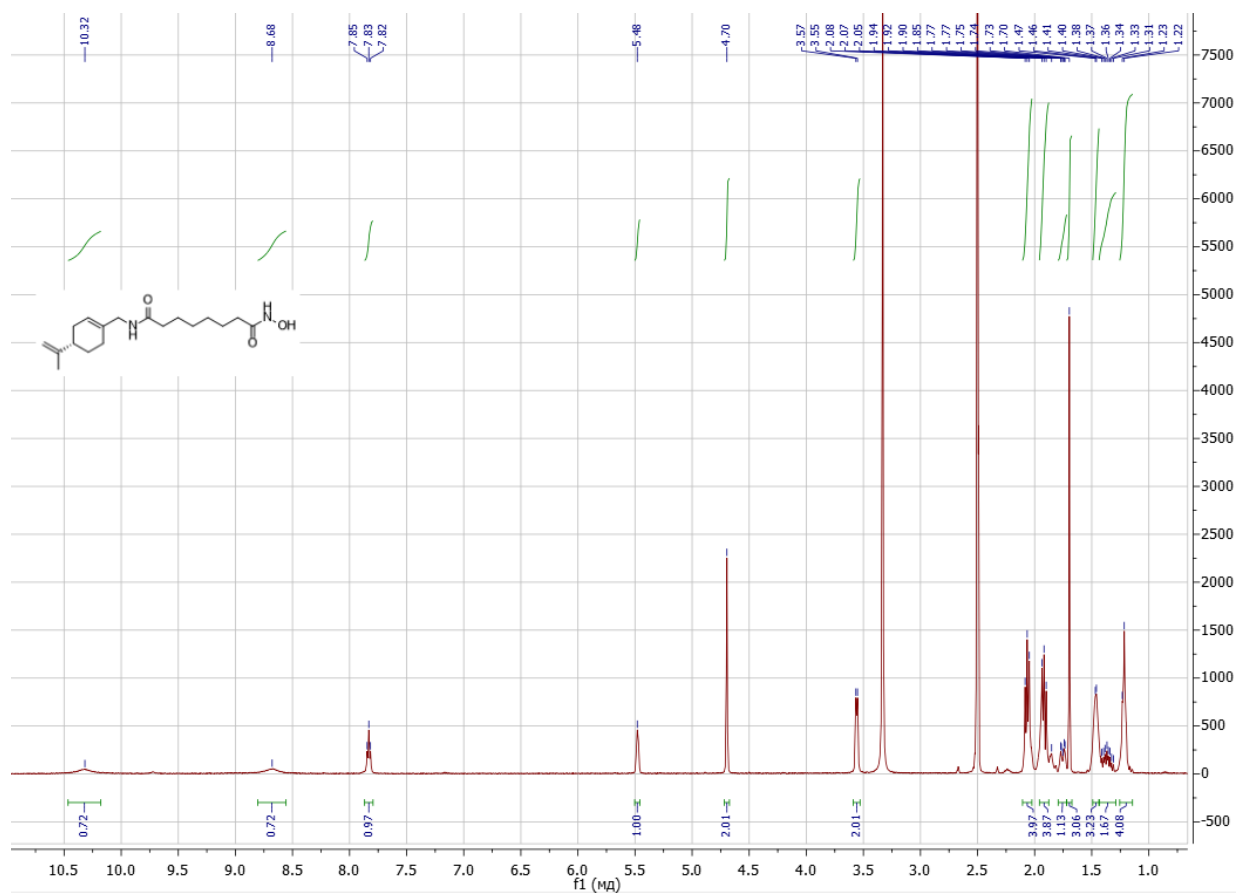

$^{13}\text{C}$  NMR spectrum of compound **30**

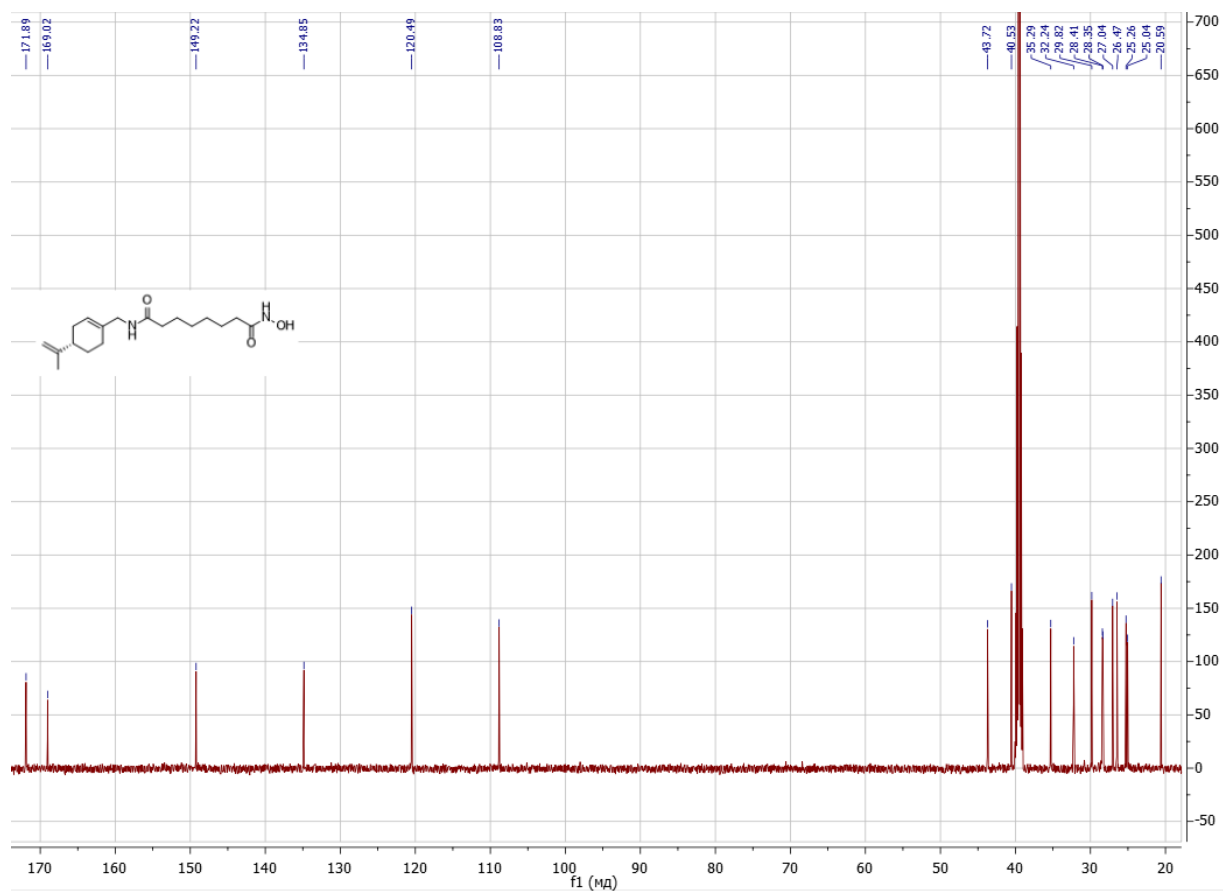

## Mass-spectrum of compound **30**

ms-469 #38 RT: 2.48 AV: 1 NL: 4.79E4  
T: + c EI Full ms [32.50-350.50]

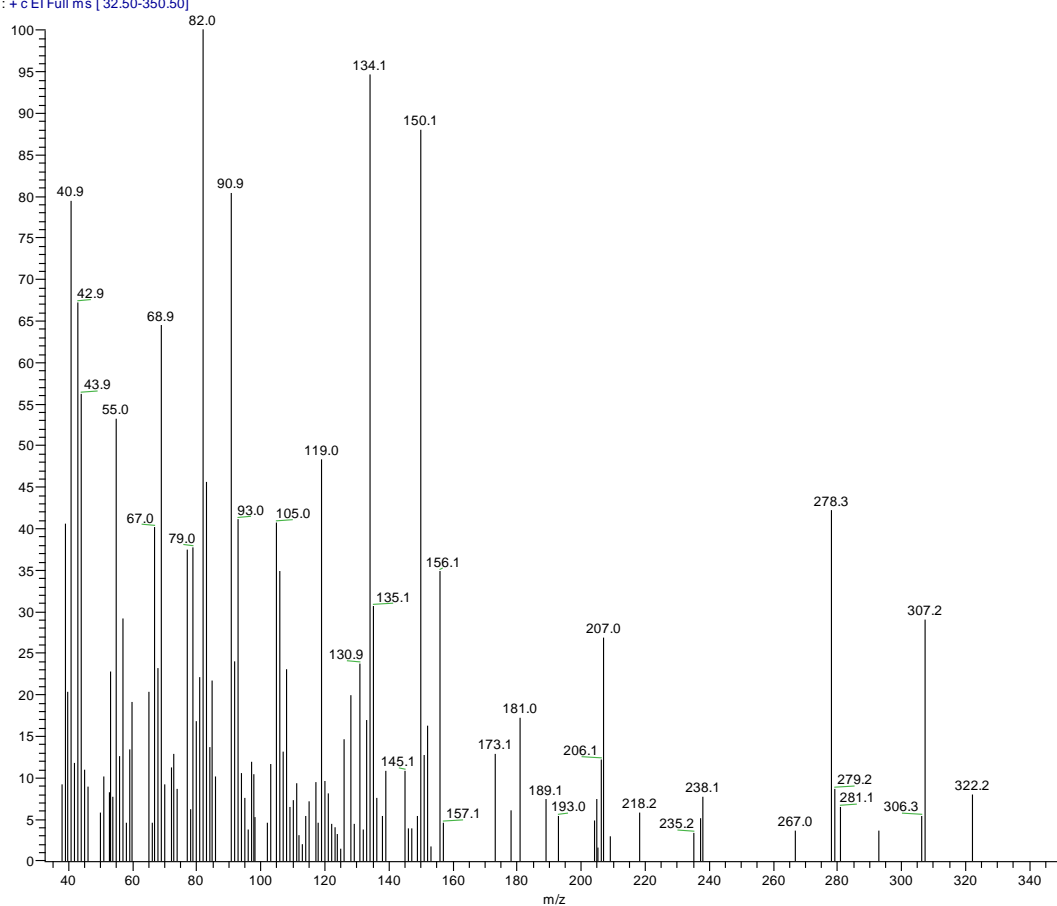

## $^1\text{H}$ NMR spectrum of compound **31**

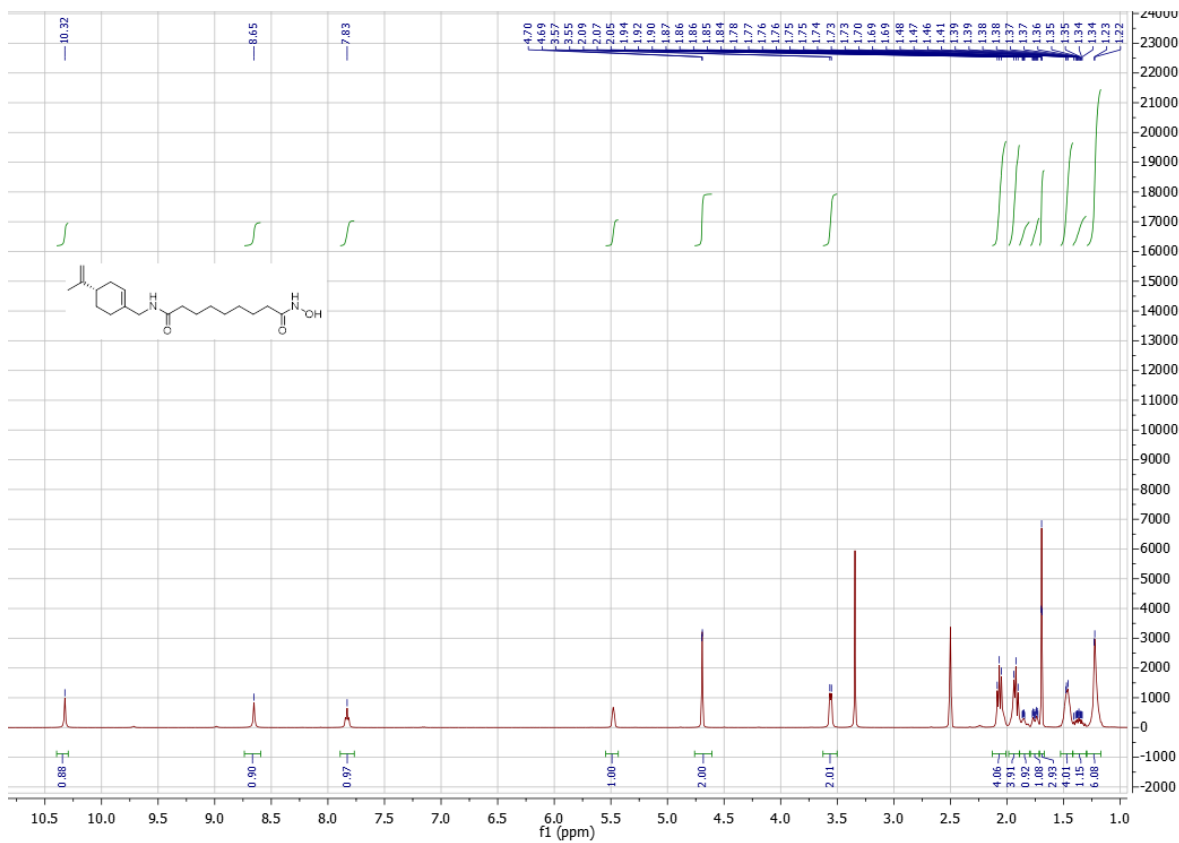

### $^{13}\text{C}$ NMR spectrum of compound **31**

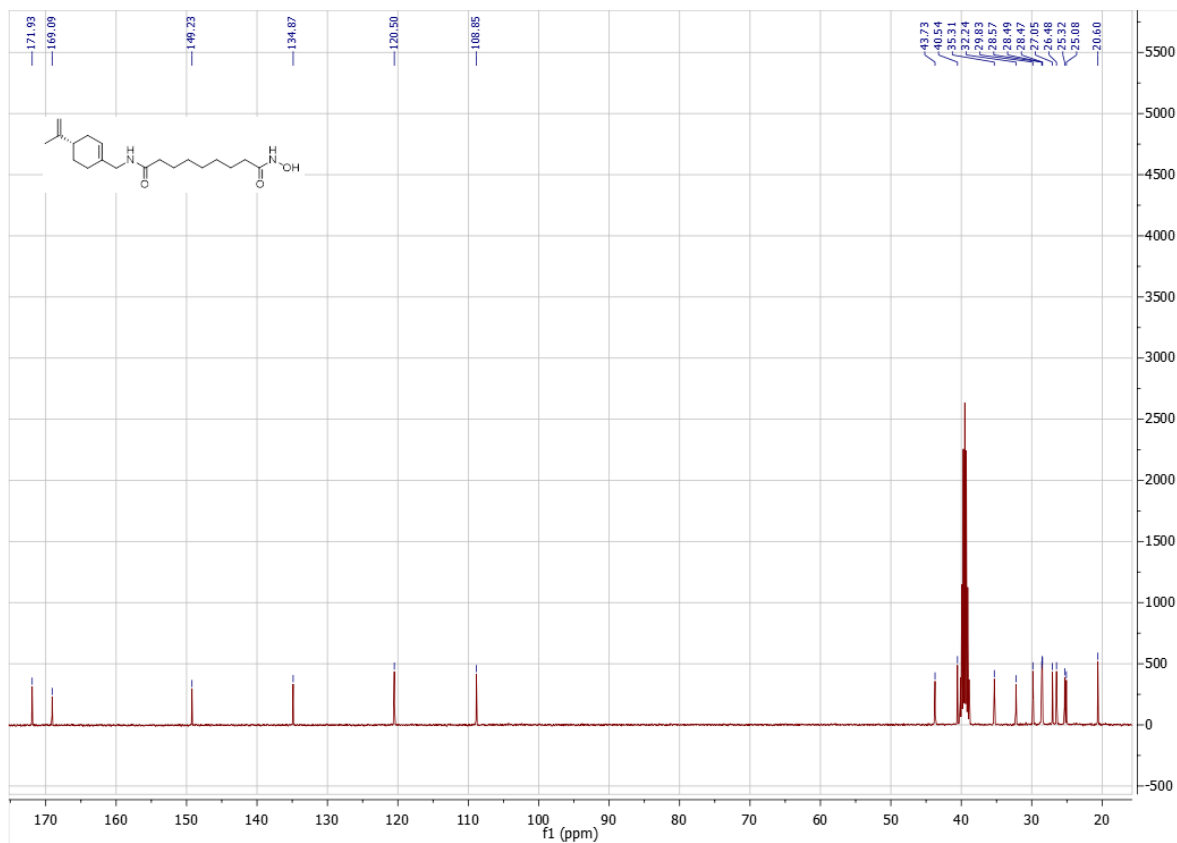

### Mass-spectrum of compound **31**

maa-497 #9 RT: 0.59 AV: 1 NL: 1.96E6  
T: + c EI Full ms [ 14.50-360.50]

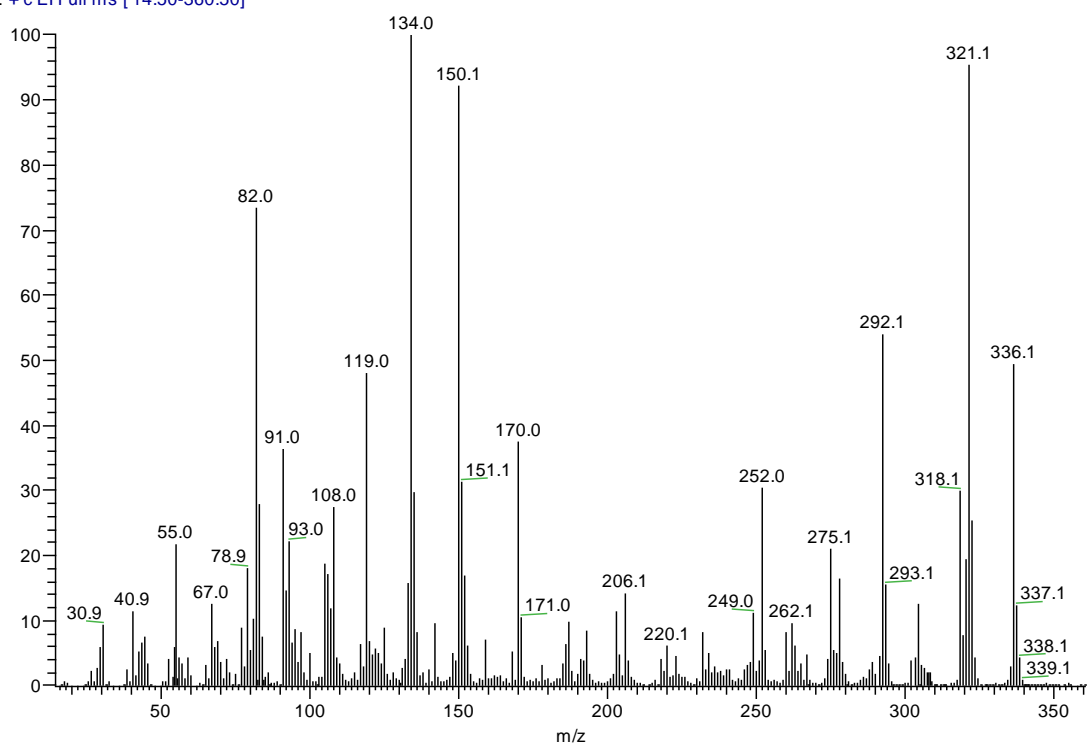

### <sup>1</sup>H NMR spectrum of compound **34a**

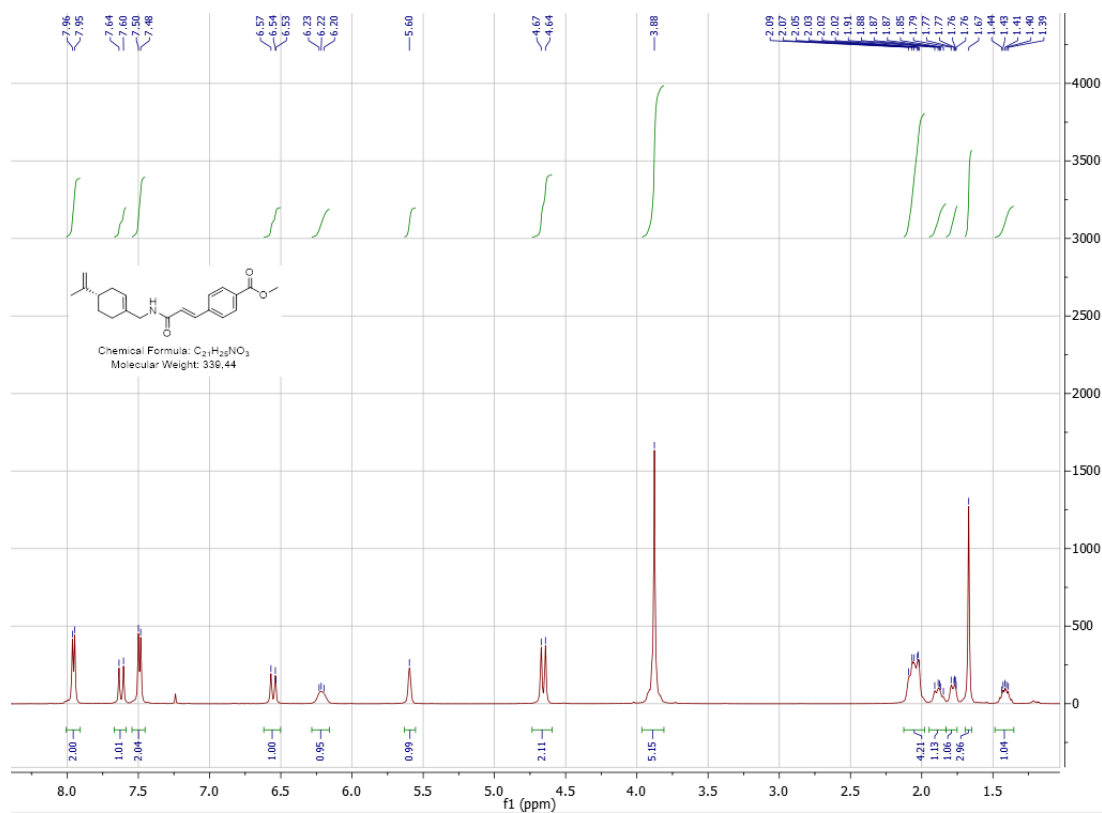

### <sup>13</sup>C NMR spectrum of compound **34a**

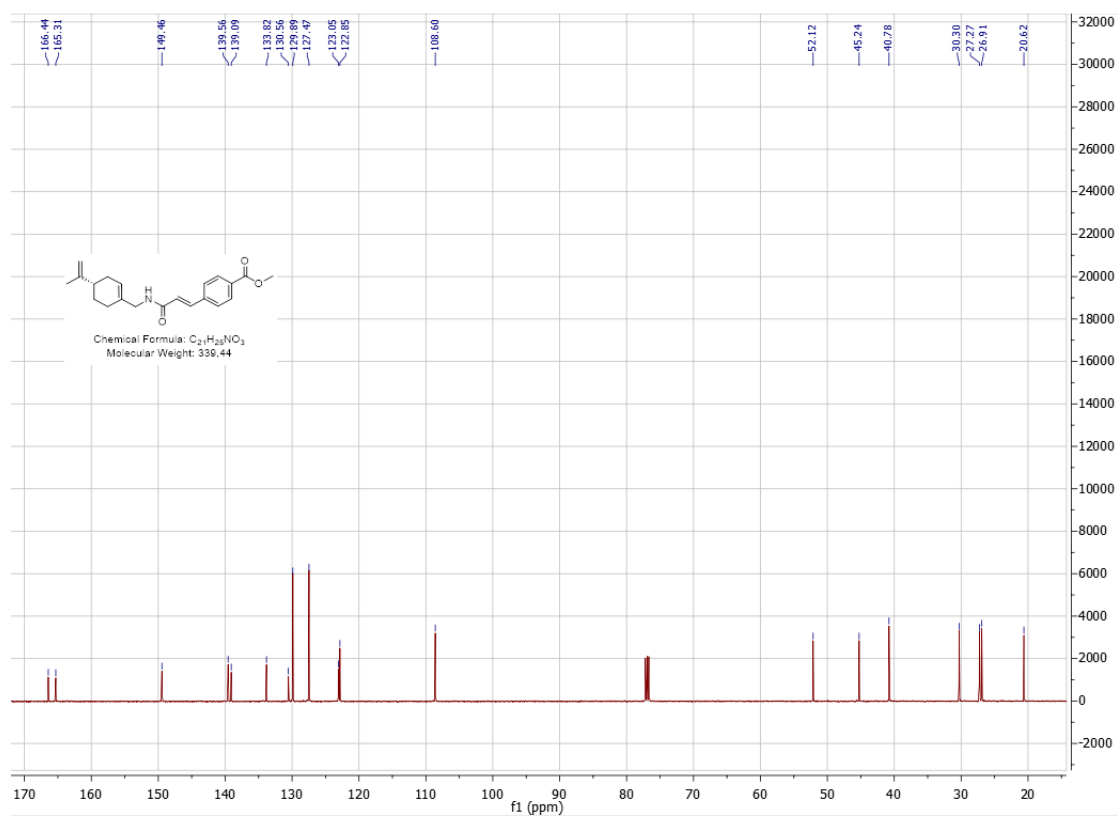

## Mass-spectrum of compound **34a**

maa-493\_210420153254 #4 RT: 0.23 AV: 1 NL: 4.49E7  
T: + c EI Full ms [14.50-380.50]

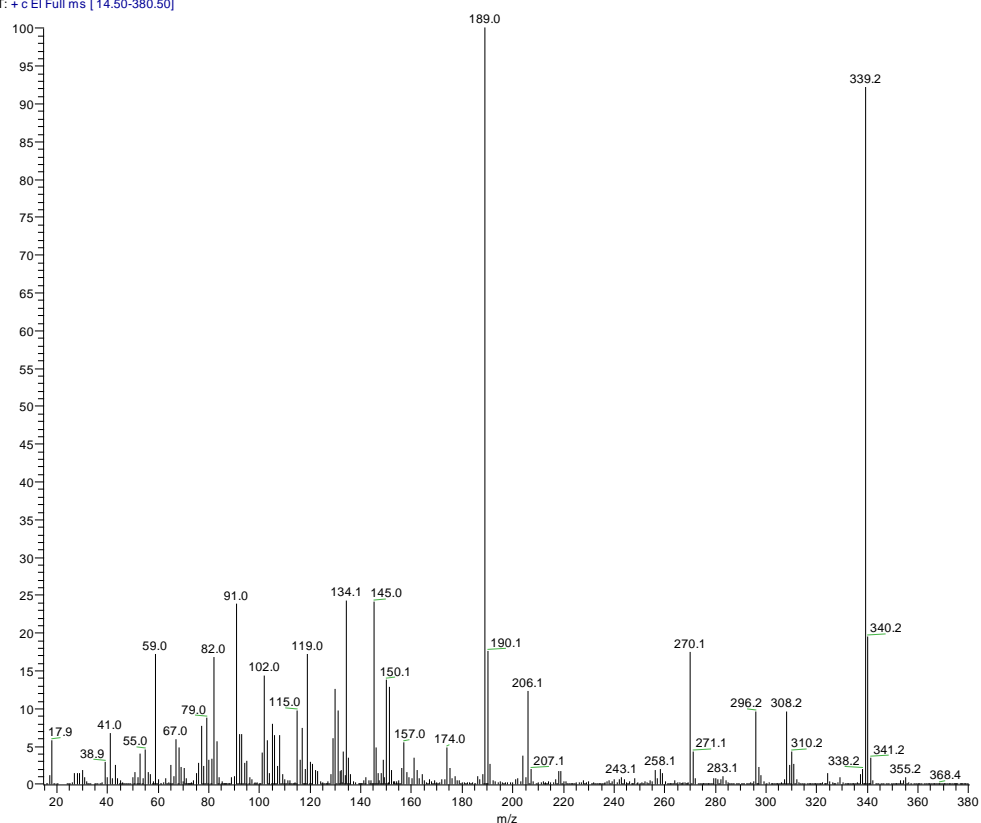

## <sup>1</sup>H NMR spectrum of compound **34b**

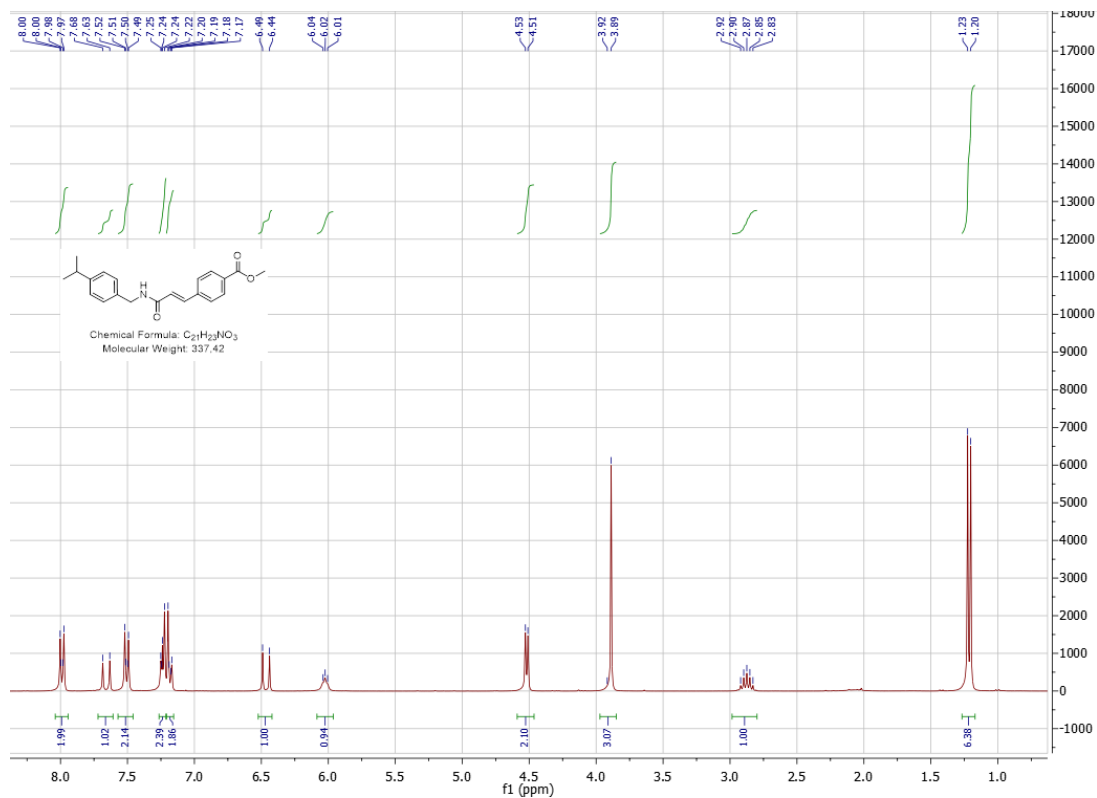

### $^{13}\text{C}$ NMR spectrum of compound **34b**

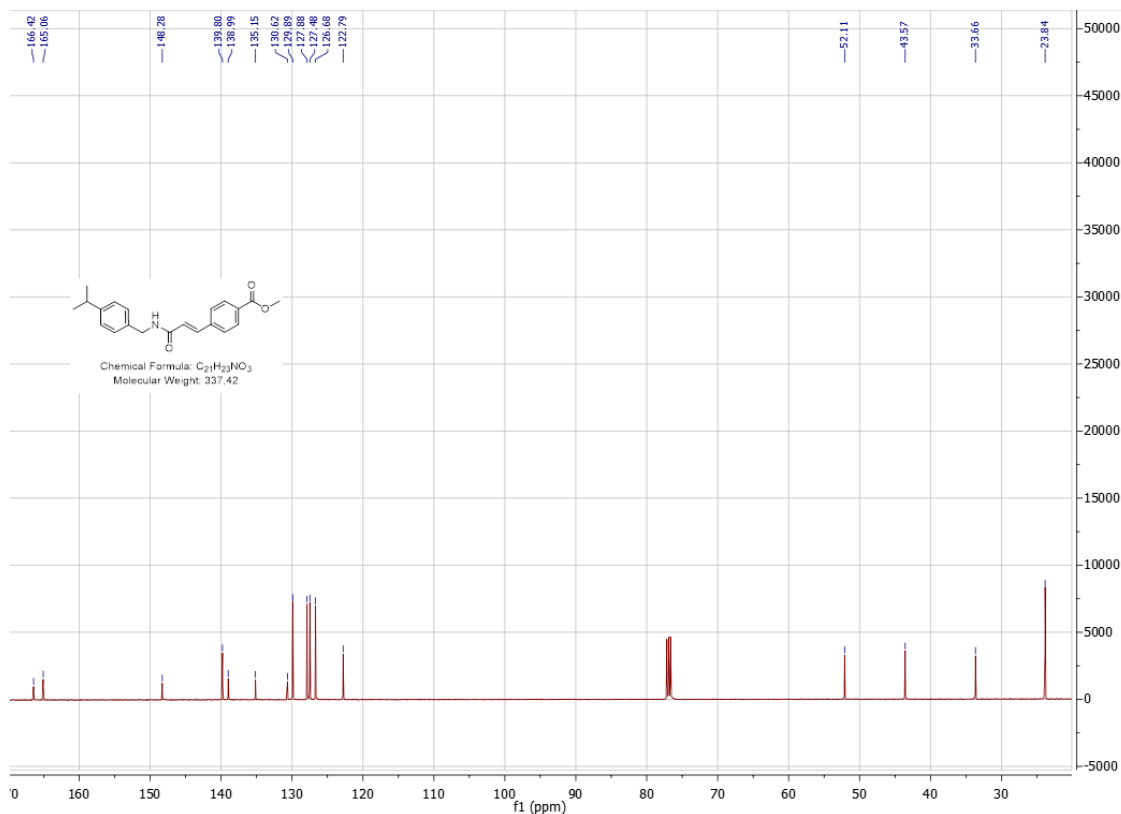

### Mass-spectrum of compound **34b**

maa-596\_220722155927 #2 RT: 0.06 AV: 1 NL: 1.17E5  
T: + c EI Full ms [32.50-344.50]

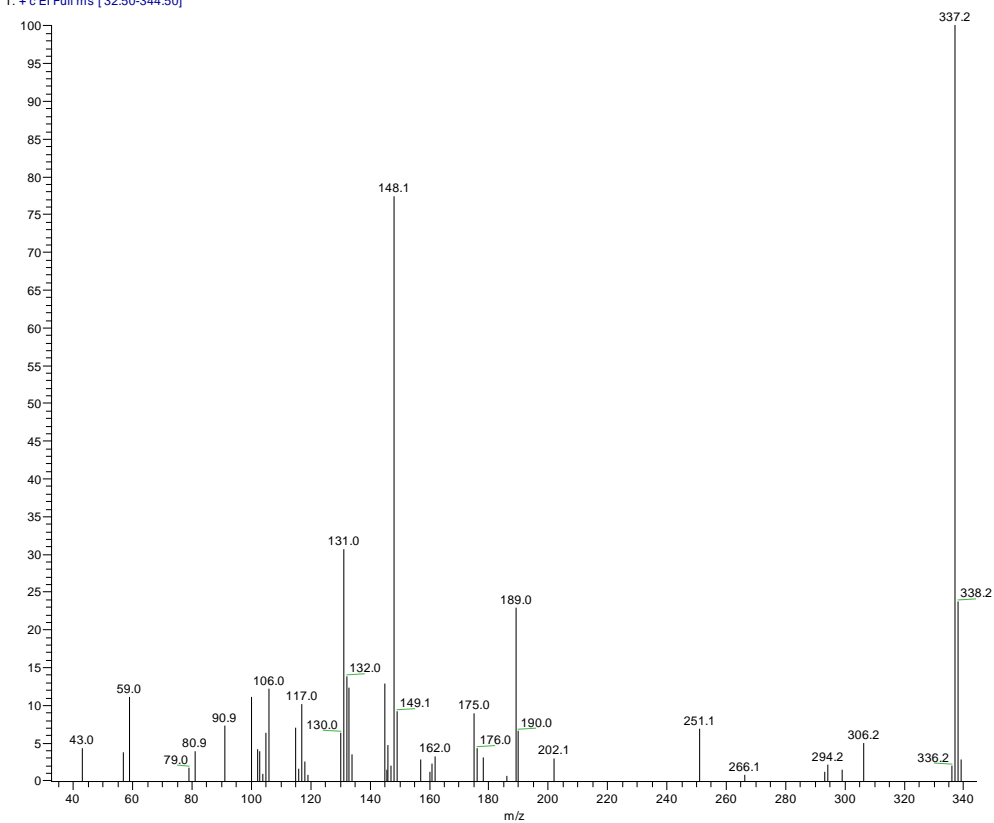

<sup>1</sup>H NMR spectrum of compound **34c**

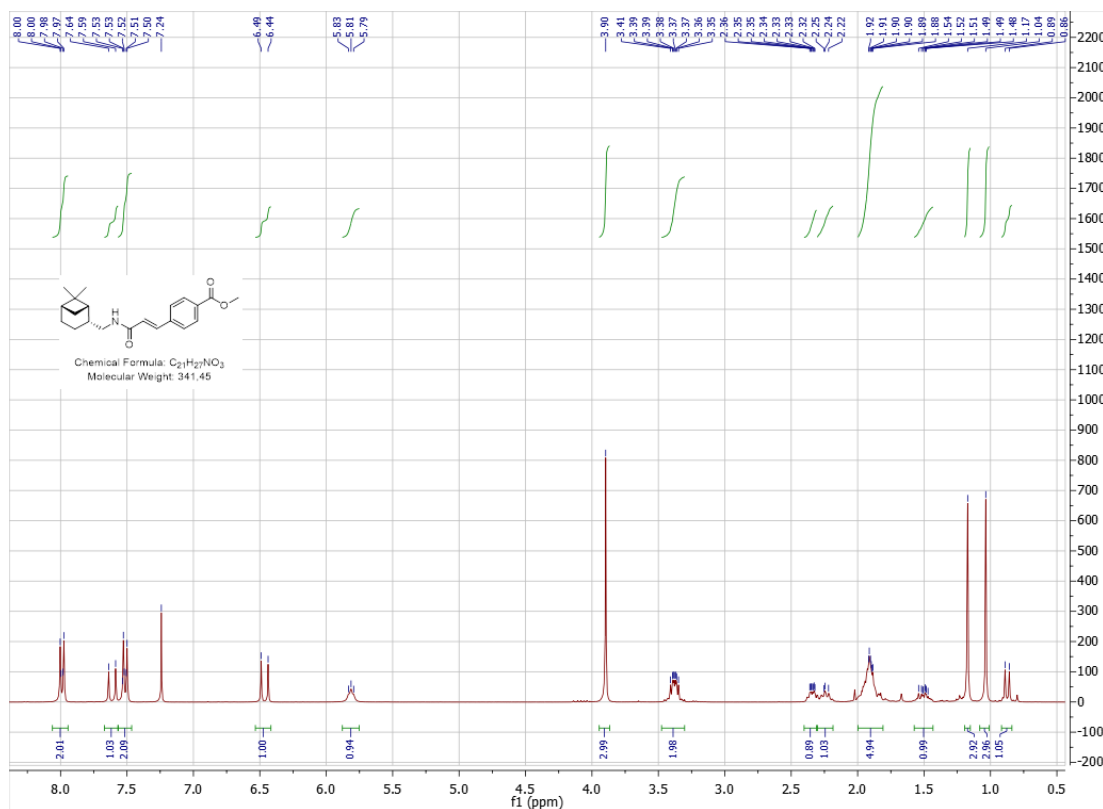

<sup>13</sup>C NMR spectrum of compound **34c**

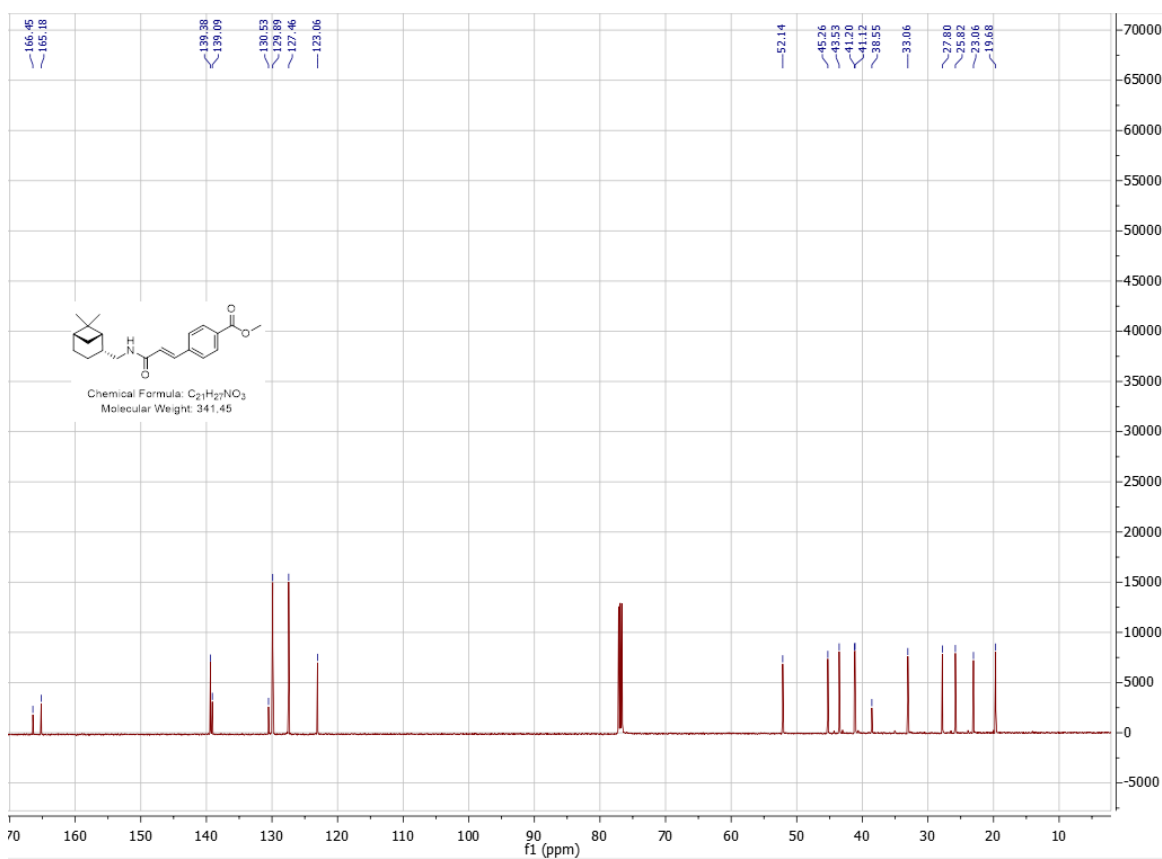

maa-583 #24 RT: 1.69 AV: 1 NL: 9.60E6  
T: + c EI Full ms [ 14.50-380.50]

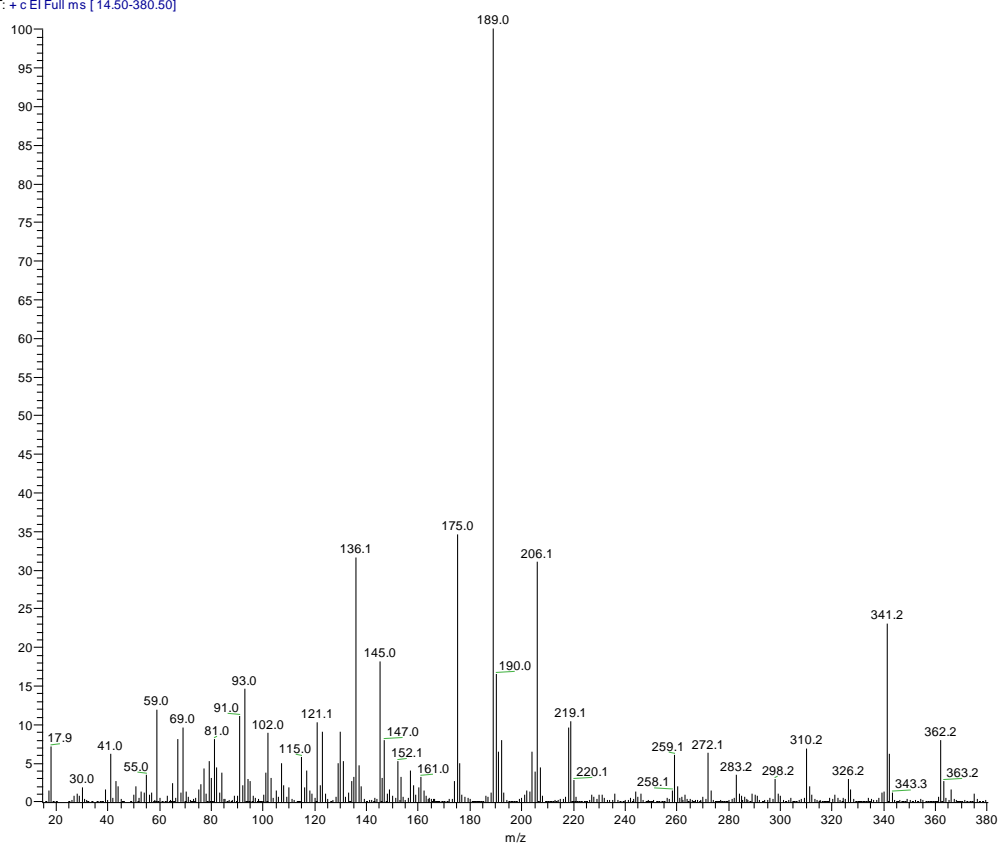

CC1=CC=C(C=C1)C(=O)NCC2=CC=CC=C2C(=O)N

11.28  
9.11  
8.26  
8.25  
8.23  
7.79  
7.75  
7.63  
7.61  
7.48  
7.44  
6.78  
6.74  
5.55  
5.54  
4.70  
4.68  
3.72  
3.22  
2.50  
2.50  
2.50  
2.07  
2.06  
2.00  
1.96  
1.91  
1.85  
1.87  
1.80  
1.79  
1.78  
1.78  
1.76  
1.75  
1.75  
1.74  
1.69  
1.61  
1.40  
1.37  
1.36  
1.35

0.83  
0.82  
0.94  
1.94  
2.02  
1.90  
0.97  
0.98  
2.03  
1.98  
4.05  
1.00  
2.94  
1.00

f1 (ppm)

### $^{13}\text{C}$ NMR spectrum of compound **35a**

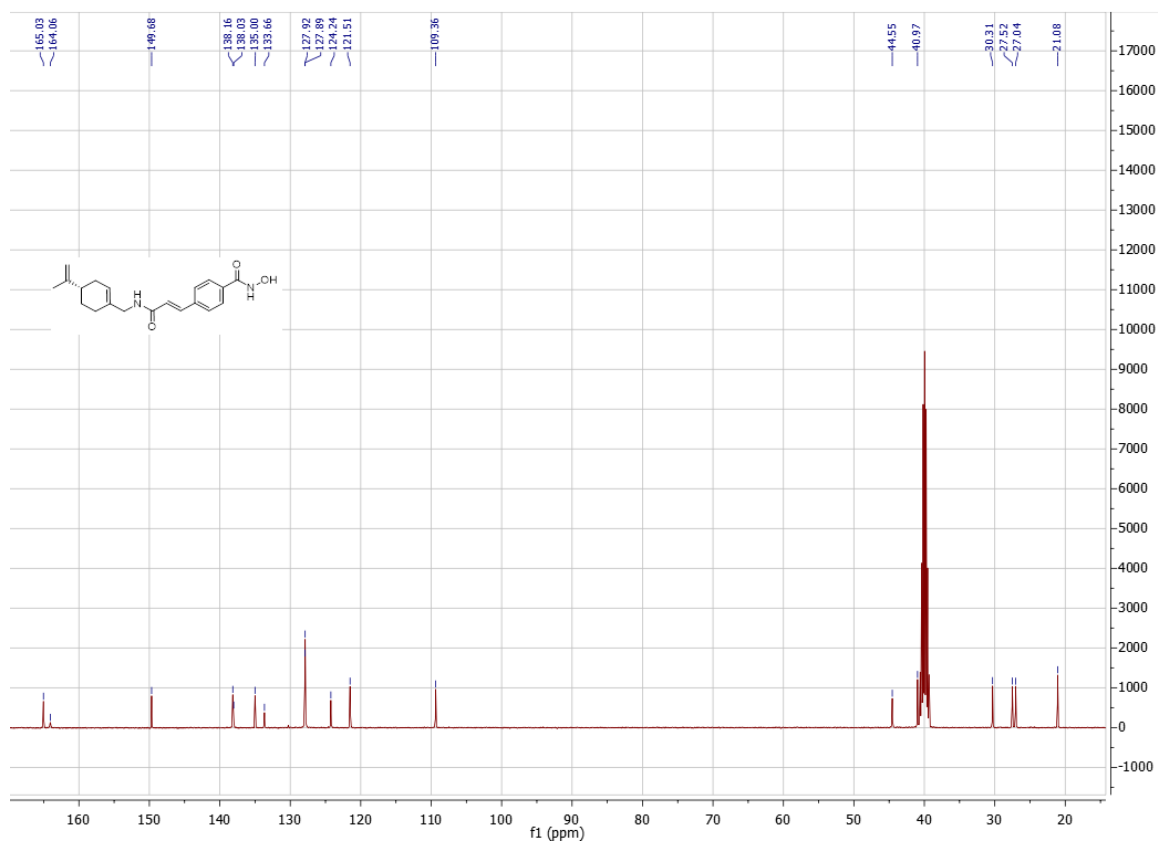

### Mass-spectrum of compound **35a**

maa-496\_210420161232 #9 RT: 0.53 AV: 1 NL: 3.82E5  
T: + c EI Full ms [32.50-370.50]

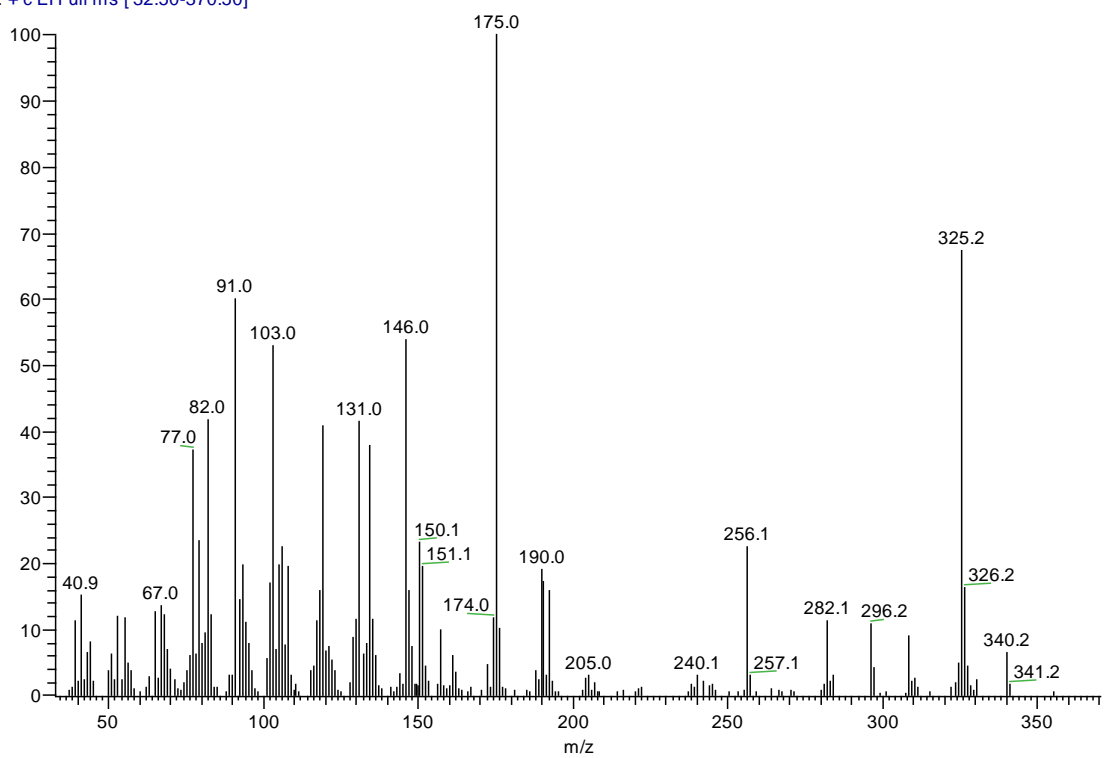

# <sup>1</sup>H NMR spectrum of compound **35b**

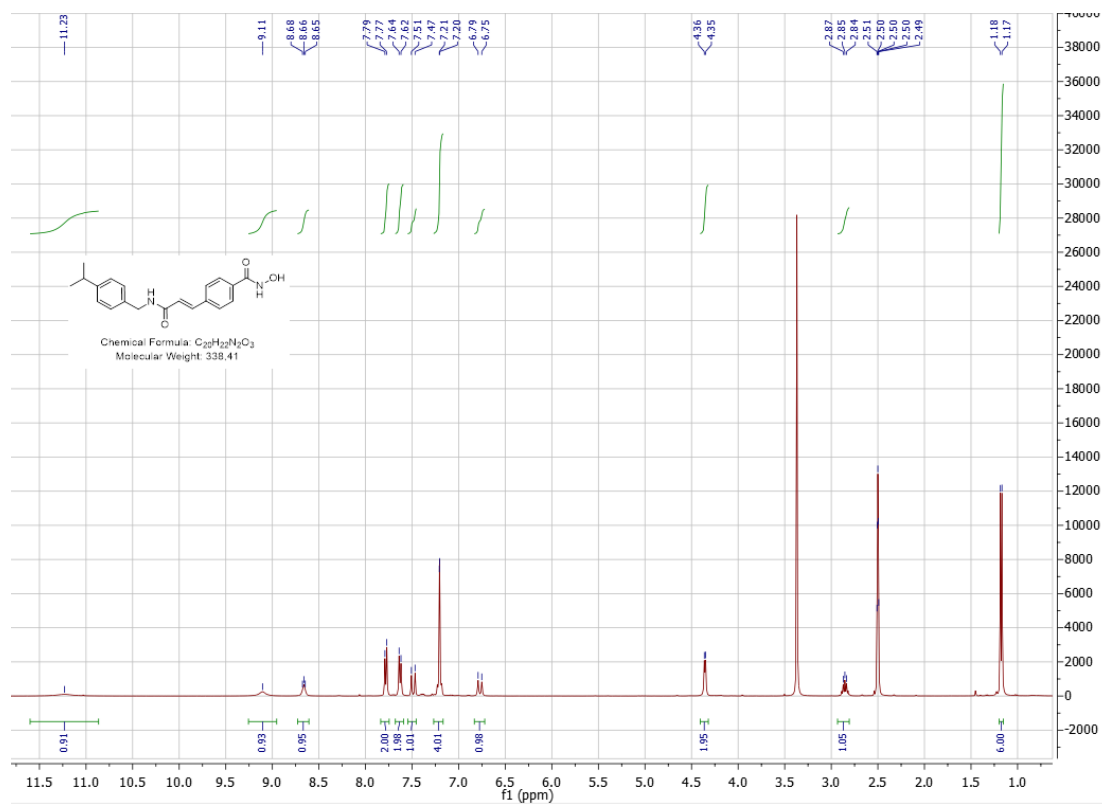

# <sup>13</sup>C NMR spectrum of compound **35b**

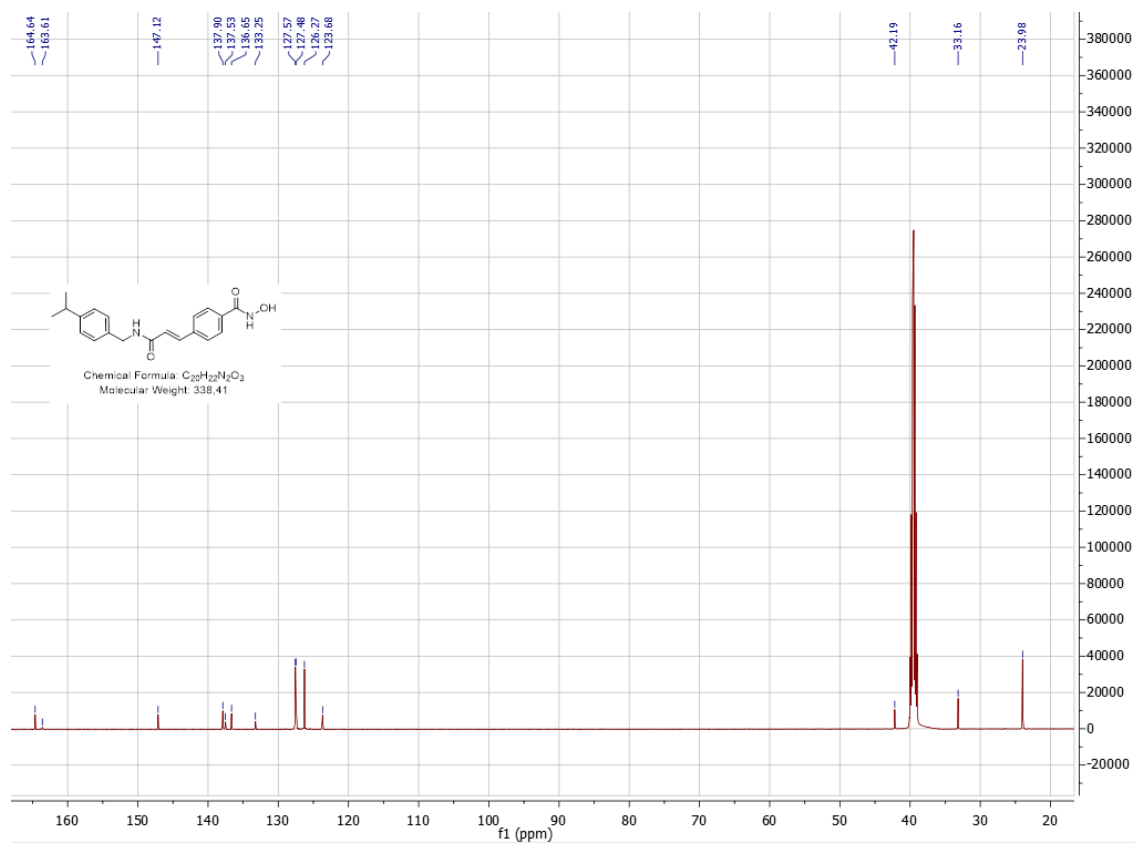

# <sup>1</sup>H NMR spectrum of compound **35c**

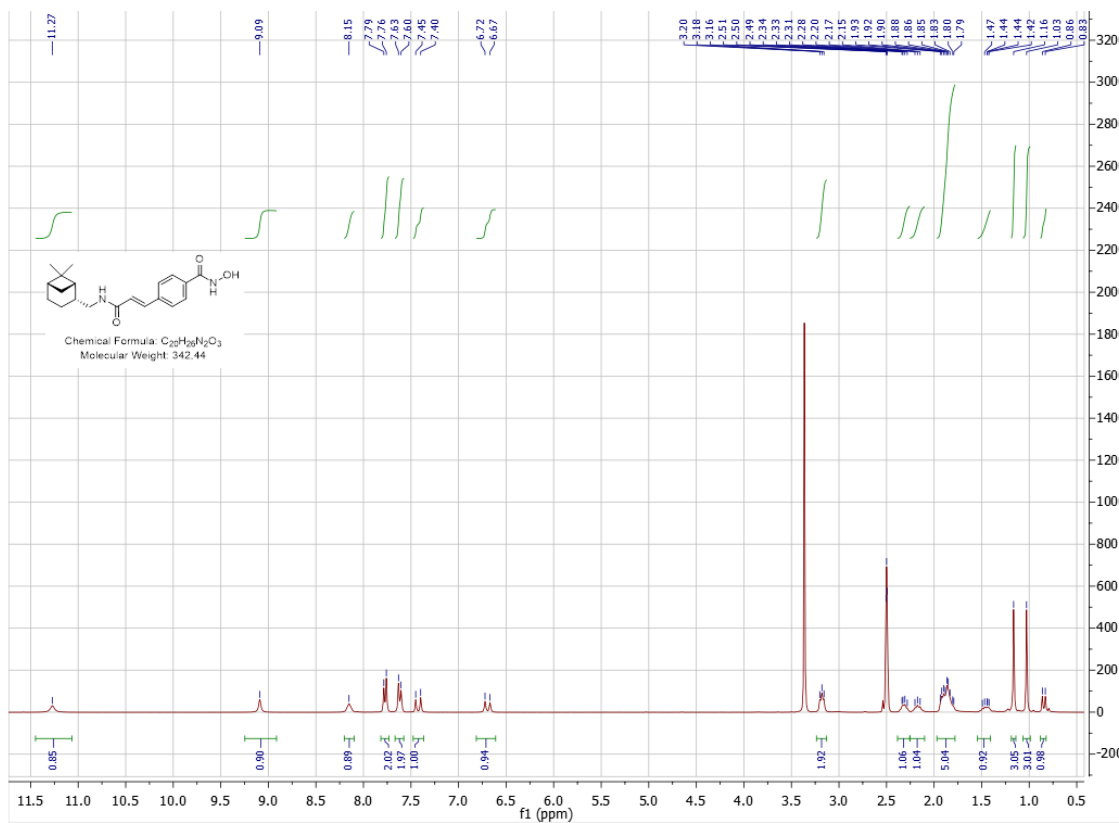

# <sup>13</sup>C NMR spectrum of compound **35c**

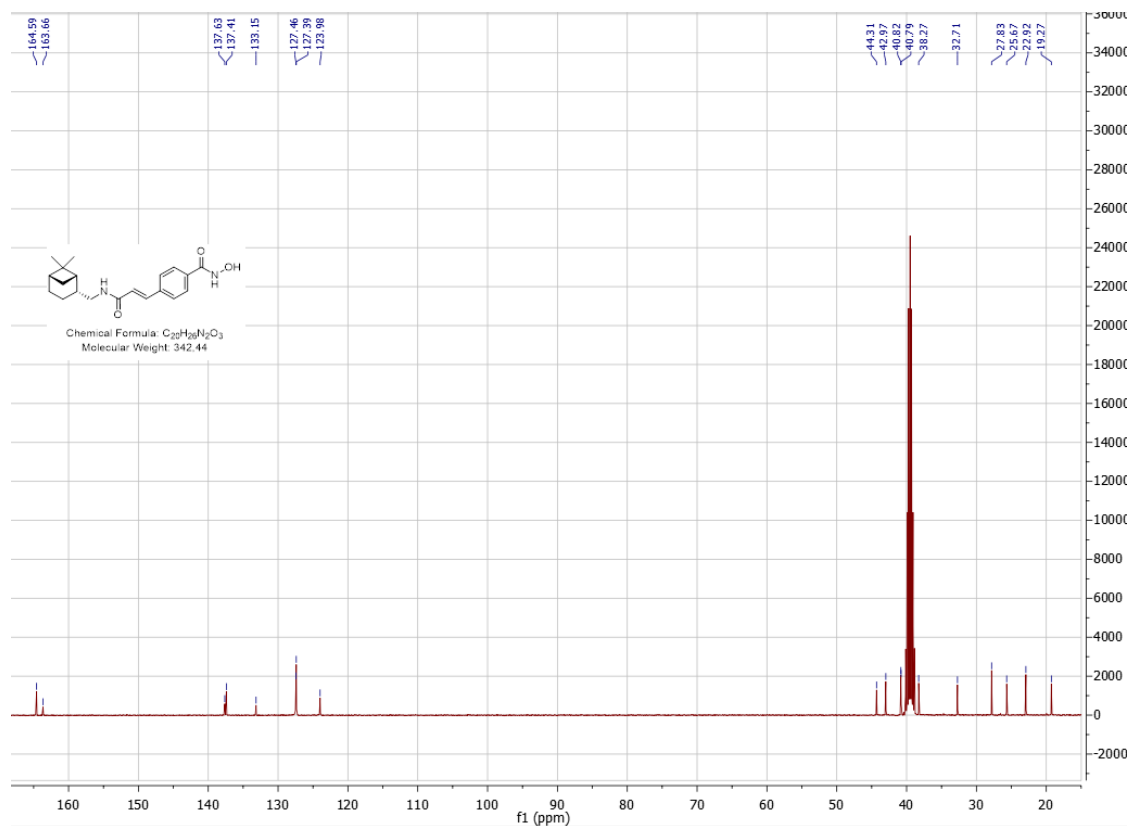

# <sup>1</sup>H NMR spectrum of compound **37a**

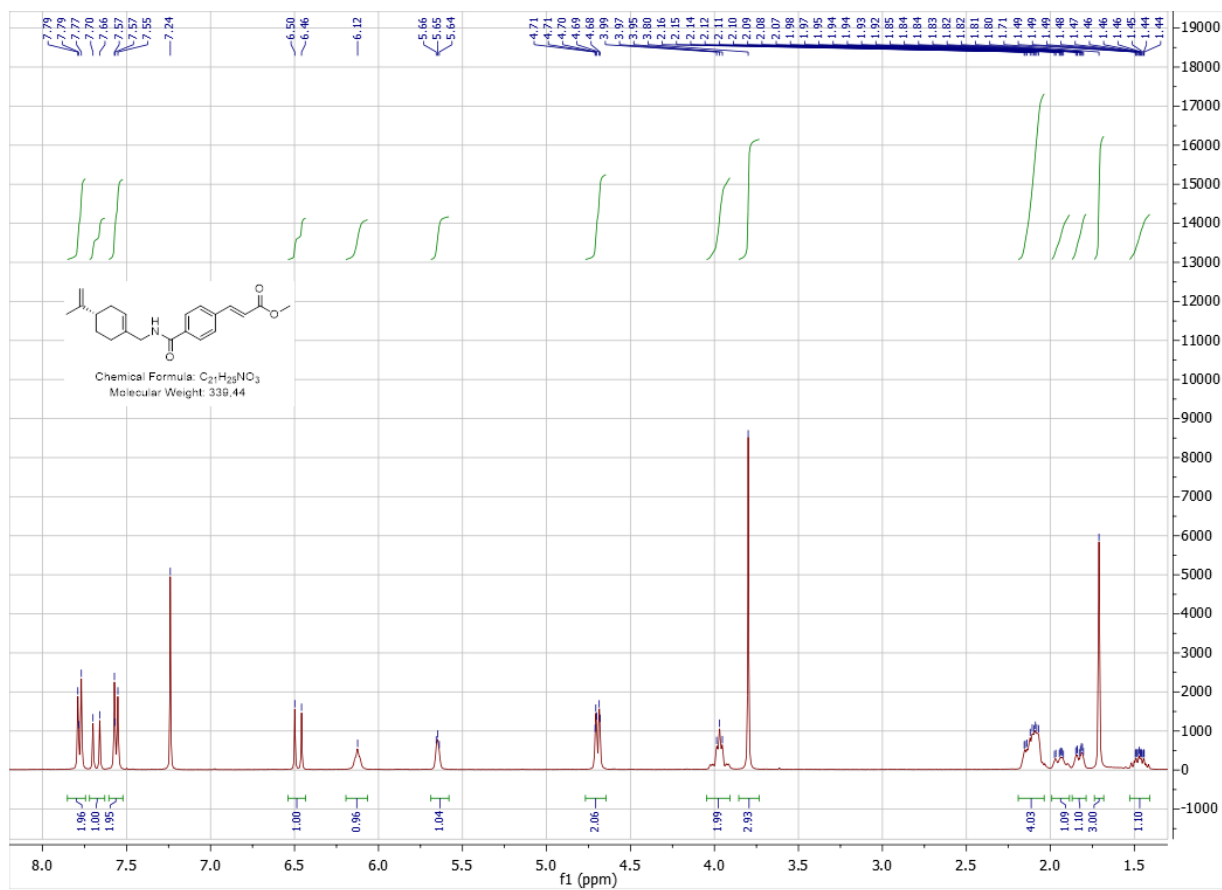

# <sup>13</sup>C NMR spectrum of compound **37a**

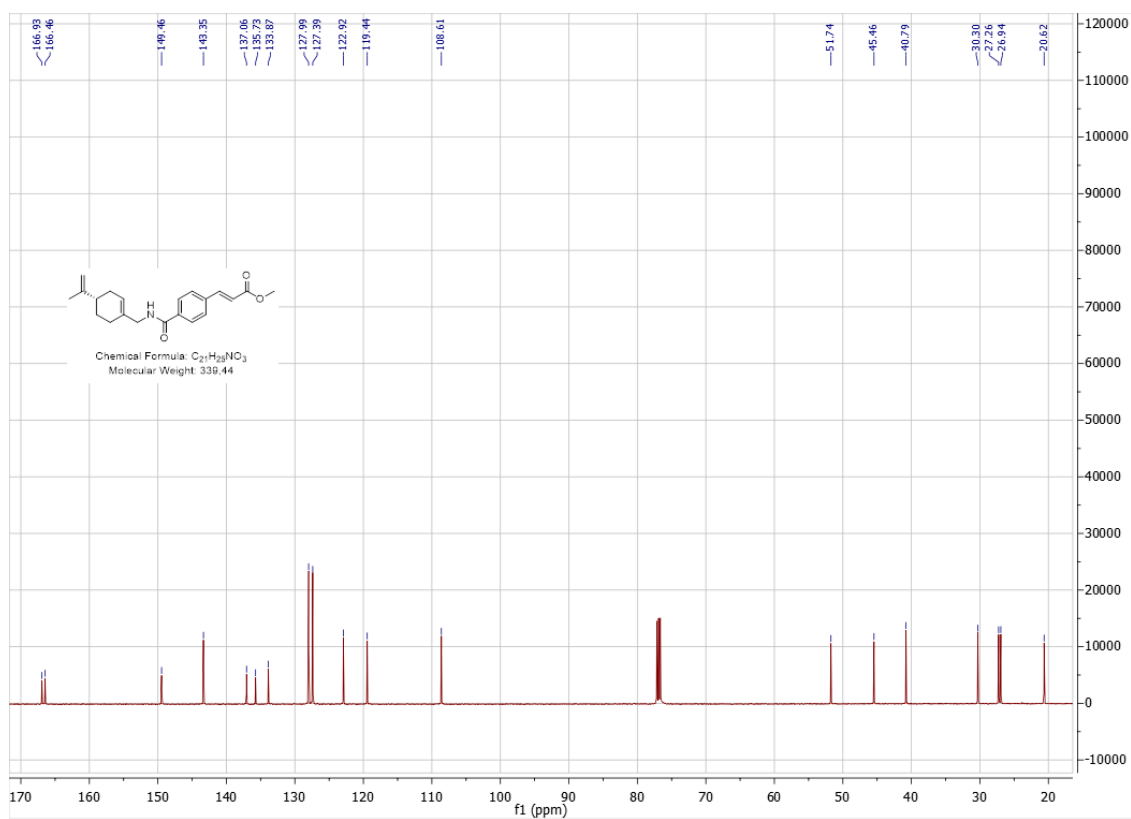

## Mass-spectrum of compound **37a**

maa-604 #1 RT: 0.00 AV: 1 NL: 9.02E5  
T: + c EI Full ms [14.50-380.50]

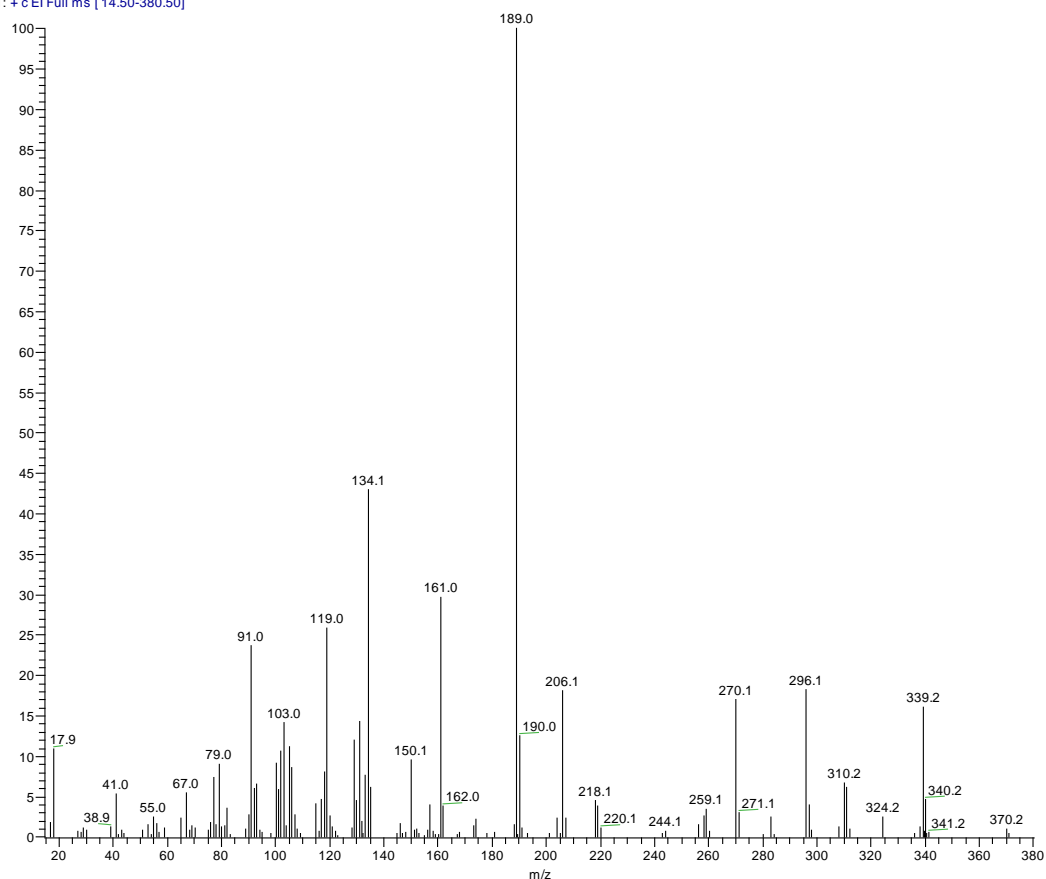

## $^1\text{H}$ NMR spectrum of compound **37b**

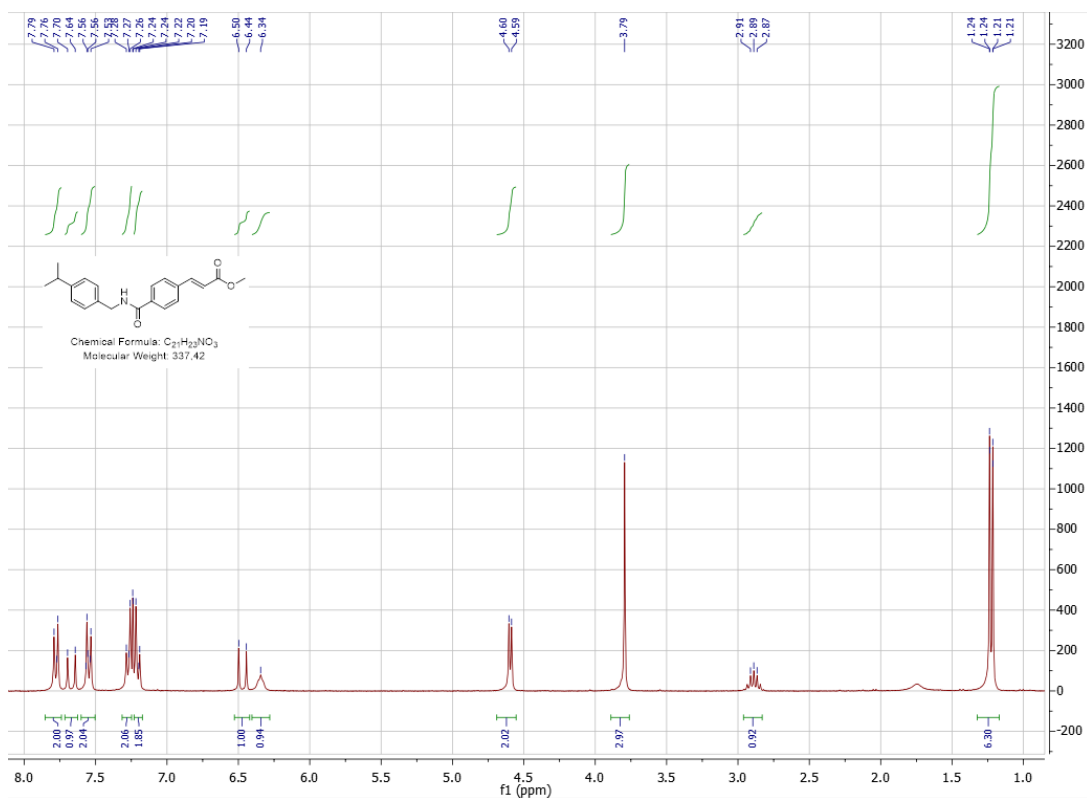

### $^{13}\text{C}$ NMR spectrum of compound **37b**

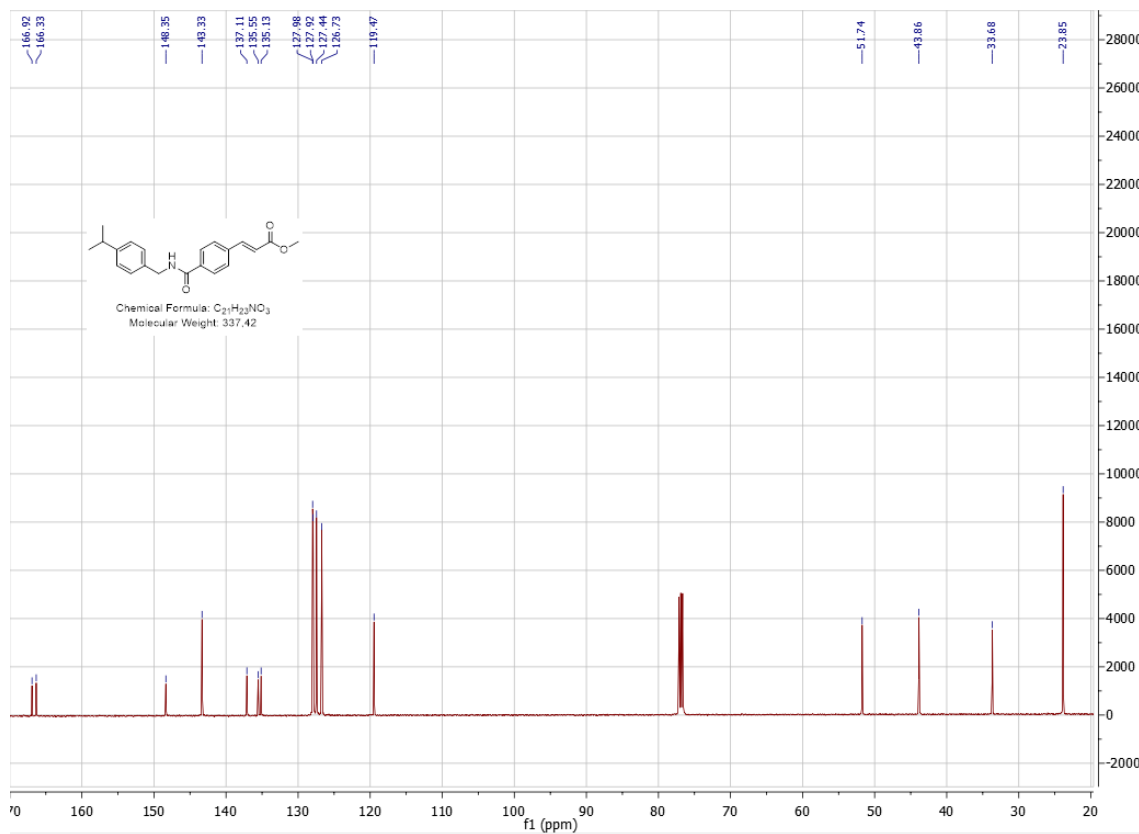

### Mass-spectrum of compound **37b**

maa-597 #13 RT: 0.70 AV: 1 NL: 5.35E6  
T: + c EI Full ms [ 32.50-350.50]

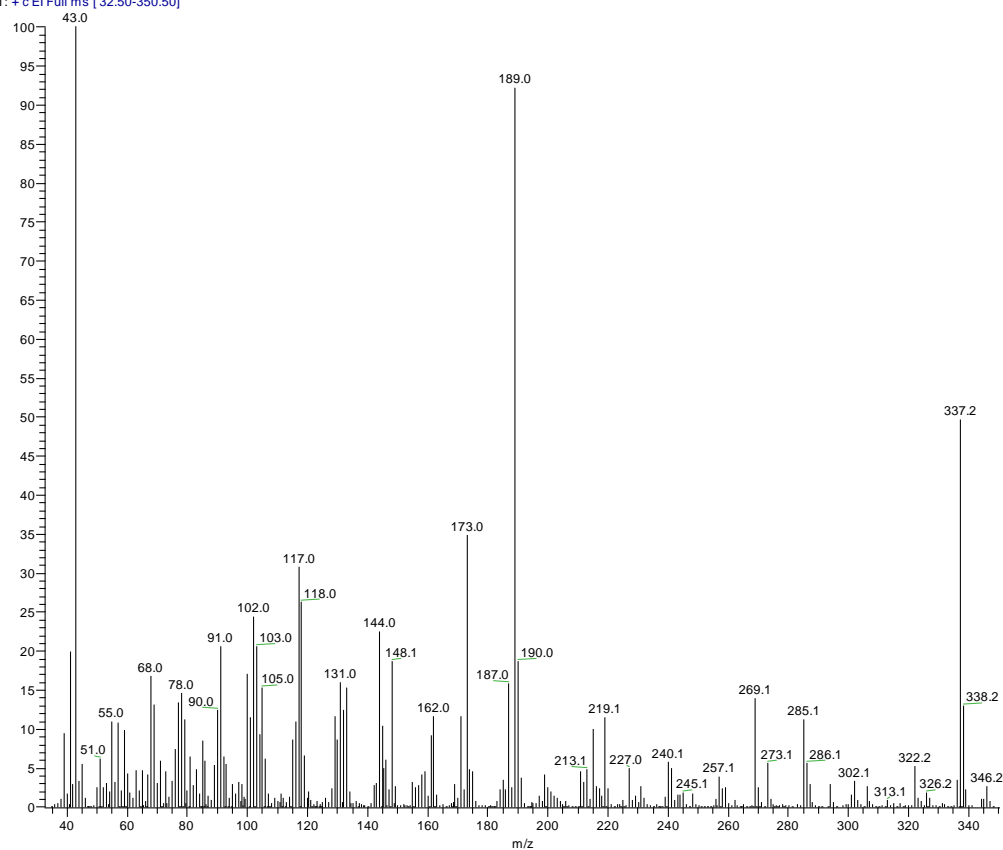

# <sup>1</sup>H NMR spectrum of compound **37c**

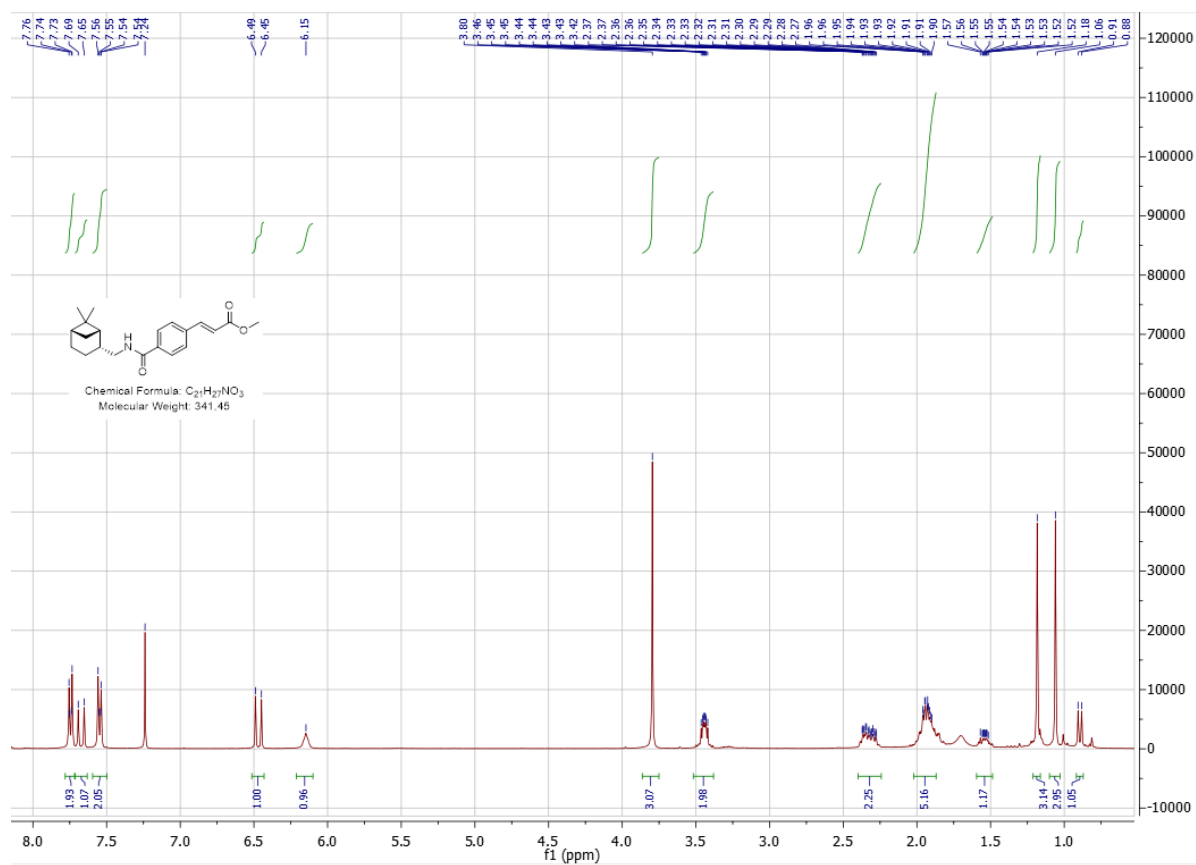

# <sup>13</sup>C NMR spectrum of compound **37c**

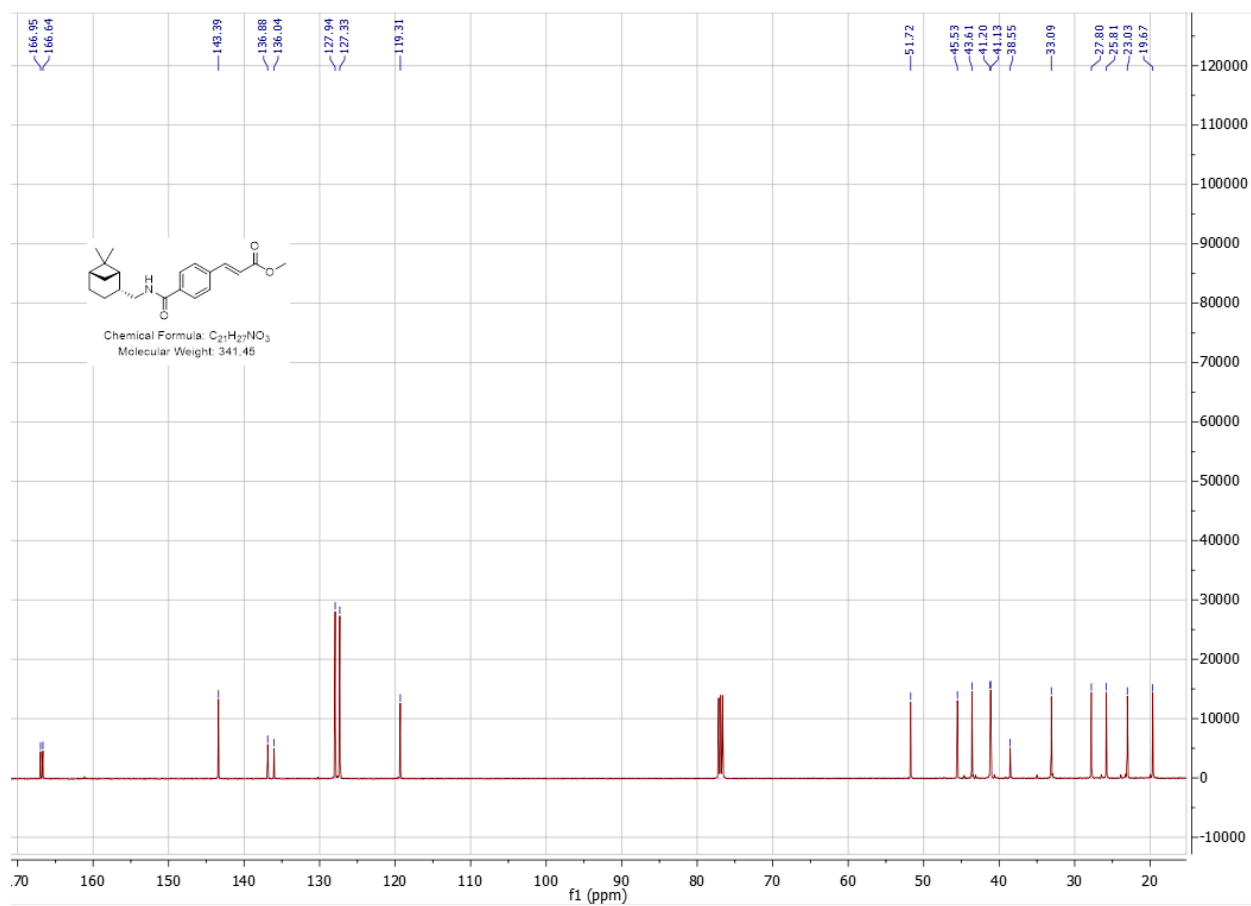

maa-586 #9 RT: 0.51 AV: 1 NL: 3.70E6  
T: + c EI Full ms [ 32.50-380.50]

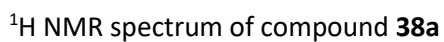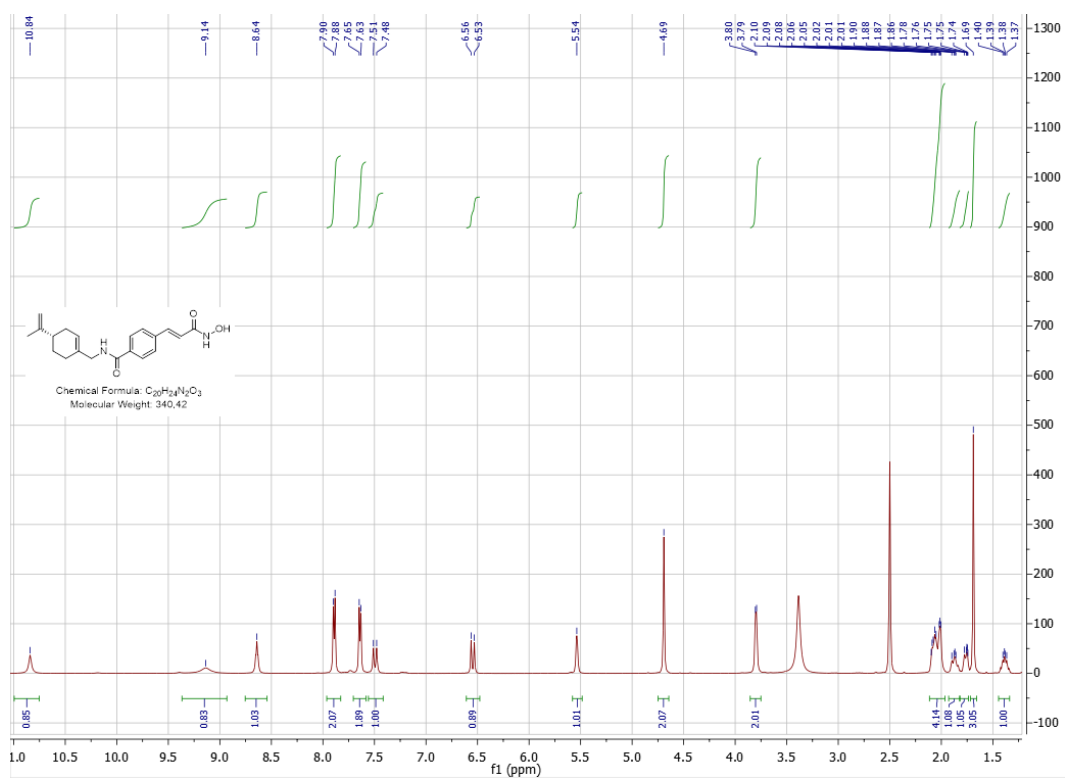

### $^{13}\text{C}$ NMR spectrum of compound **38a**

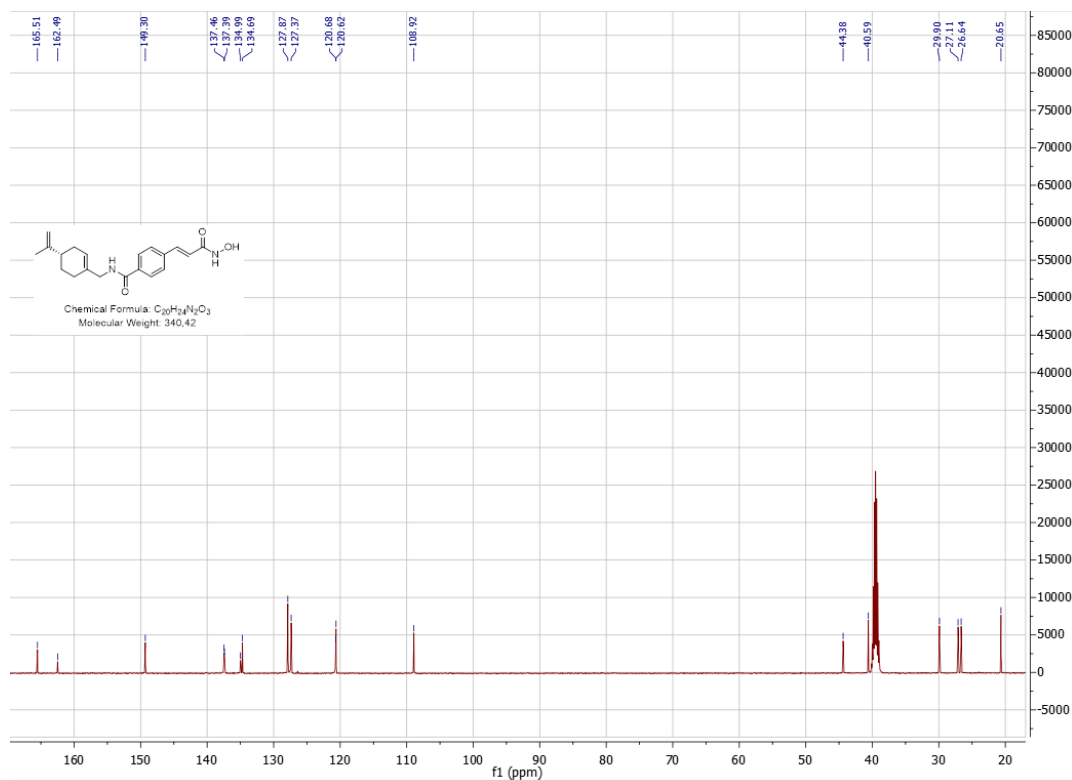

### Mass-spectrum of compound **38a**

maa-605 #37 RT: 2.69 AV: 1 NL: 3.95E6  
T: + c EI Full ms [14.50-380.50]

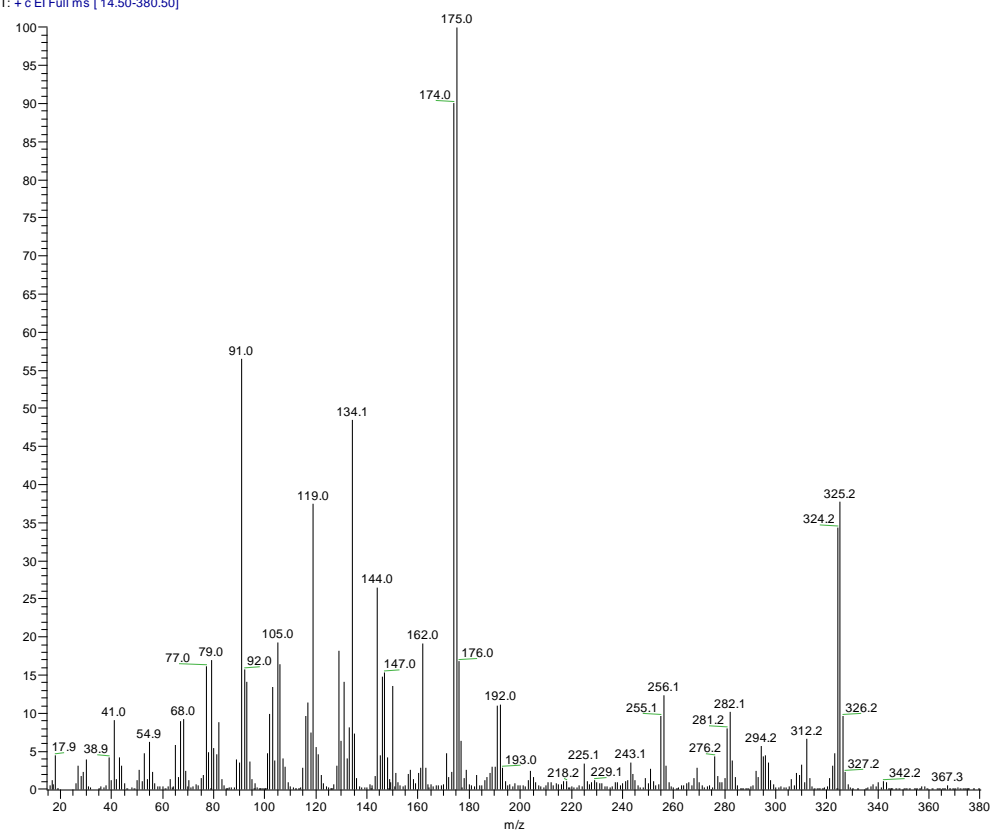

<sup>1</sup>H NMR spectrum of compound **38b**

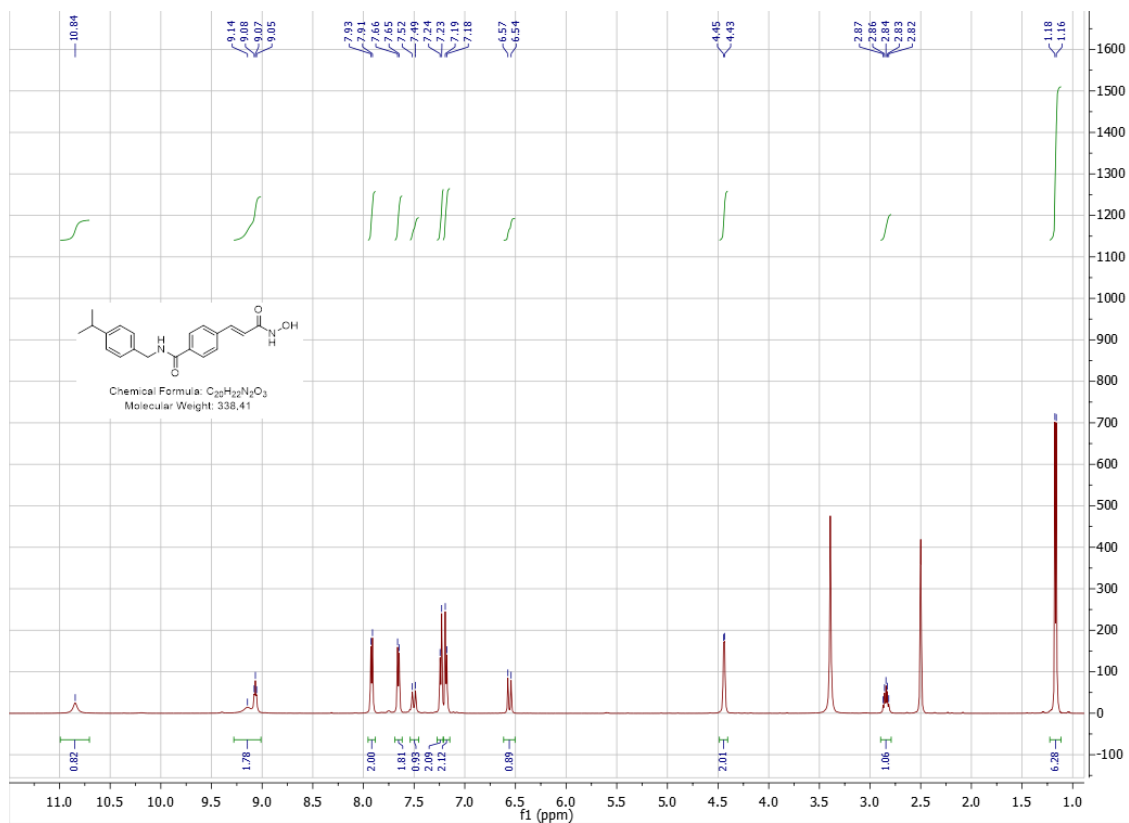

<sup>13</sup>C NMR spectrum of compound **38b**

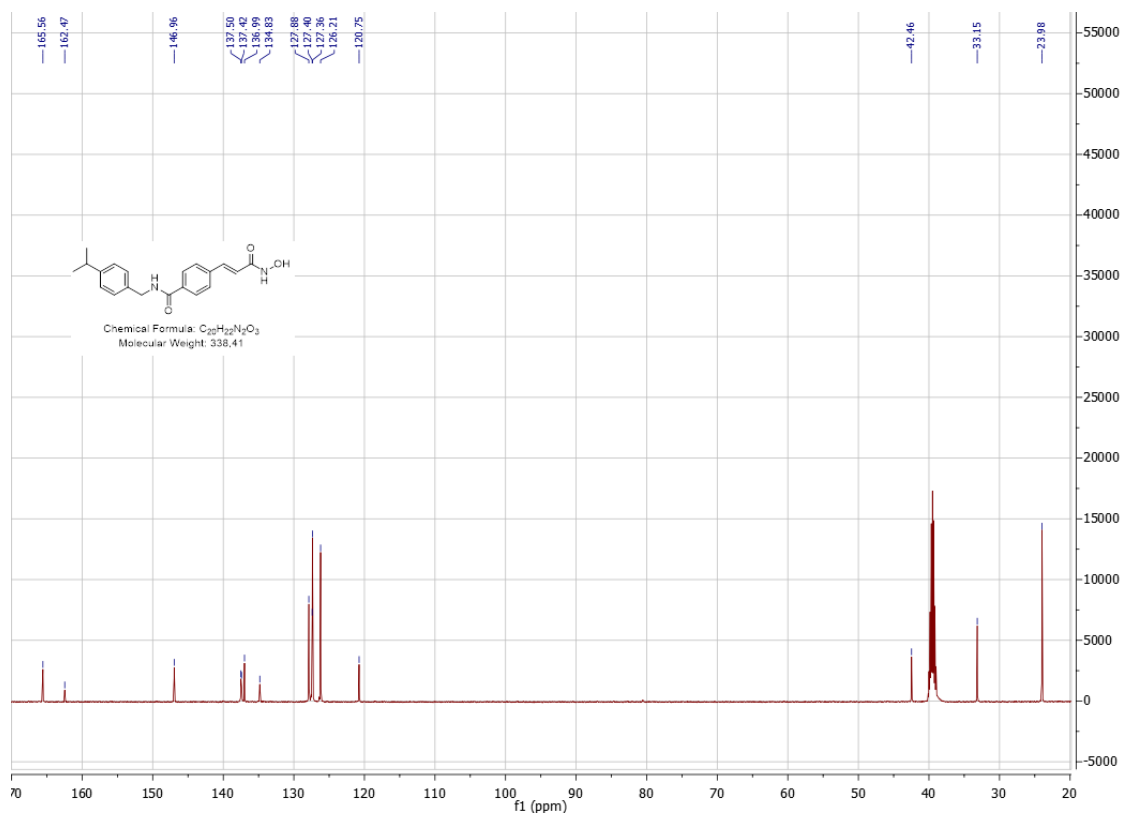

## Mass-spectrum of compound **38b**

maa-601 #3 RT: 0.15 AV: 1 NL: 2.12E5  
T: + c EI Full ms [ 14.50-380.50]

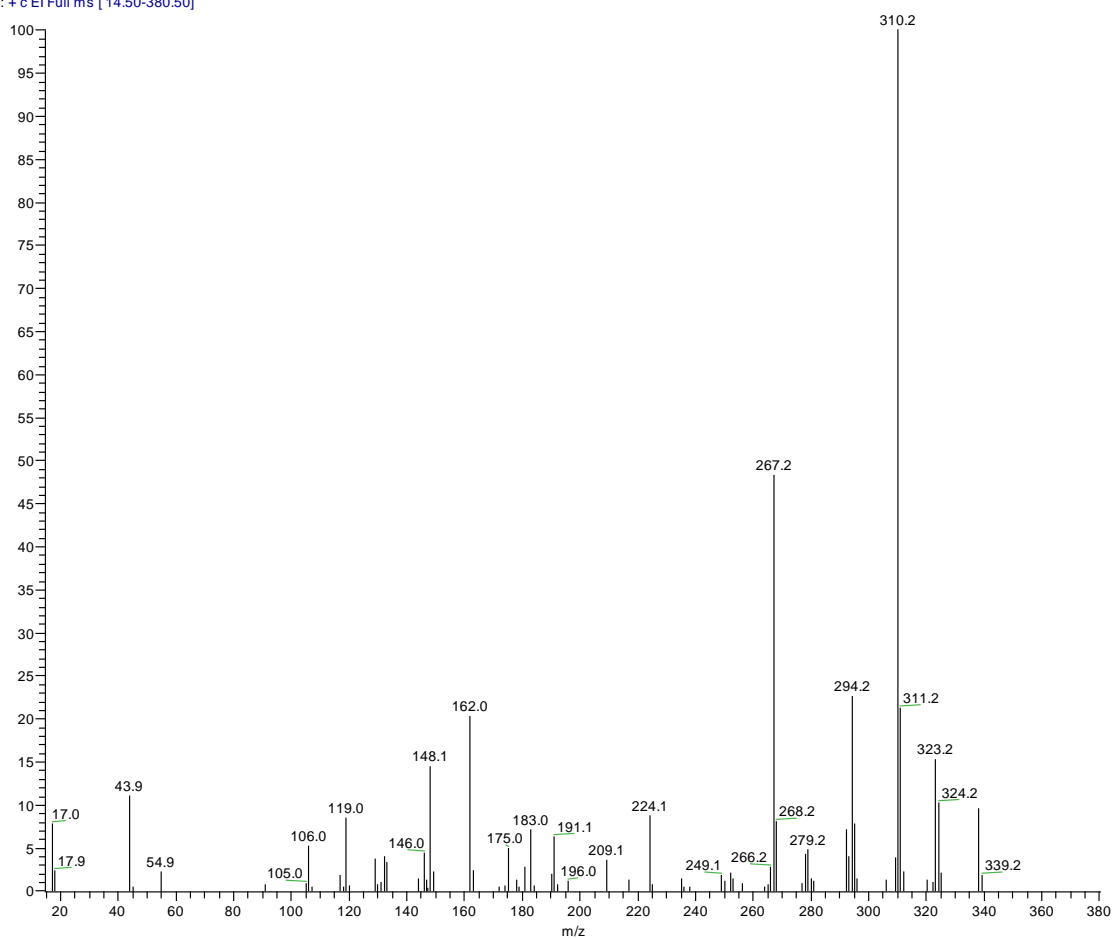

## <sup>1</sup>H NMR spectrum of compound **38c**

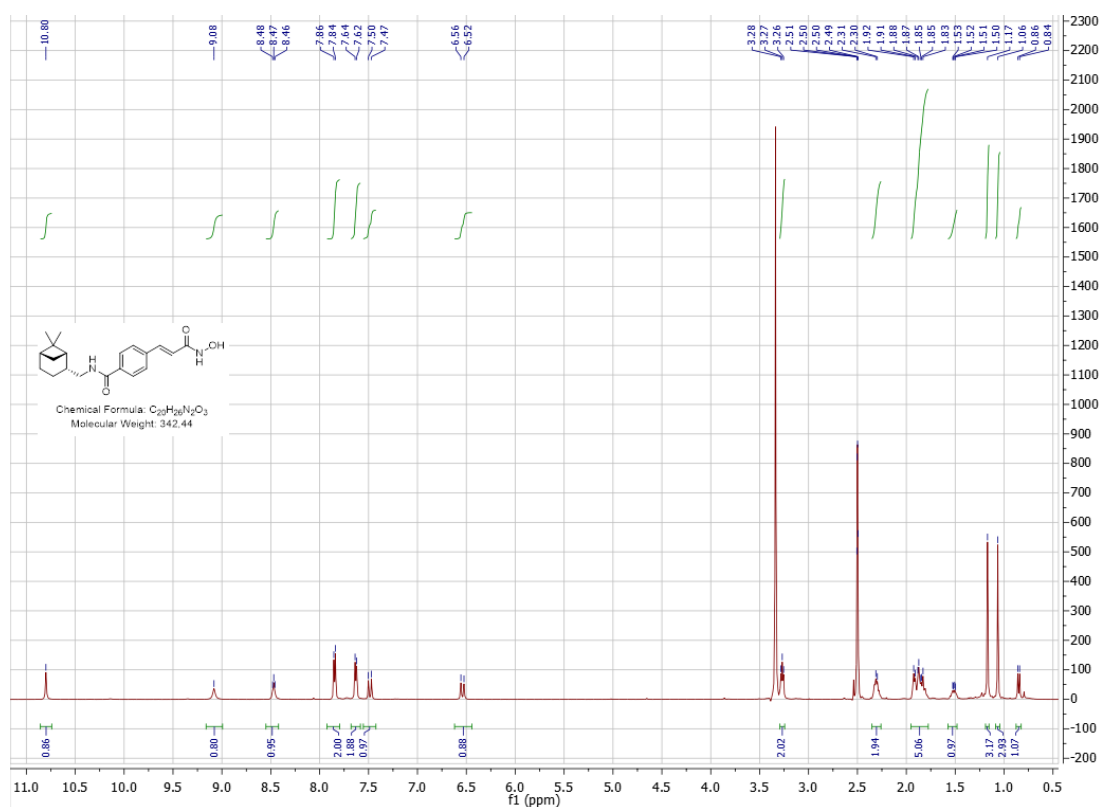

### $^{13}\text{C}$ NMR spectrum of compound **38c**

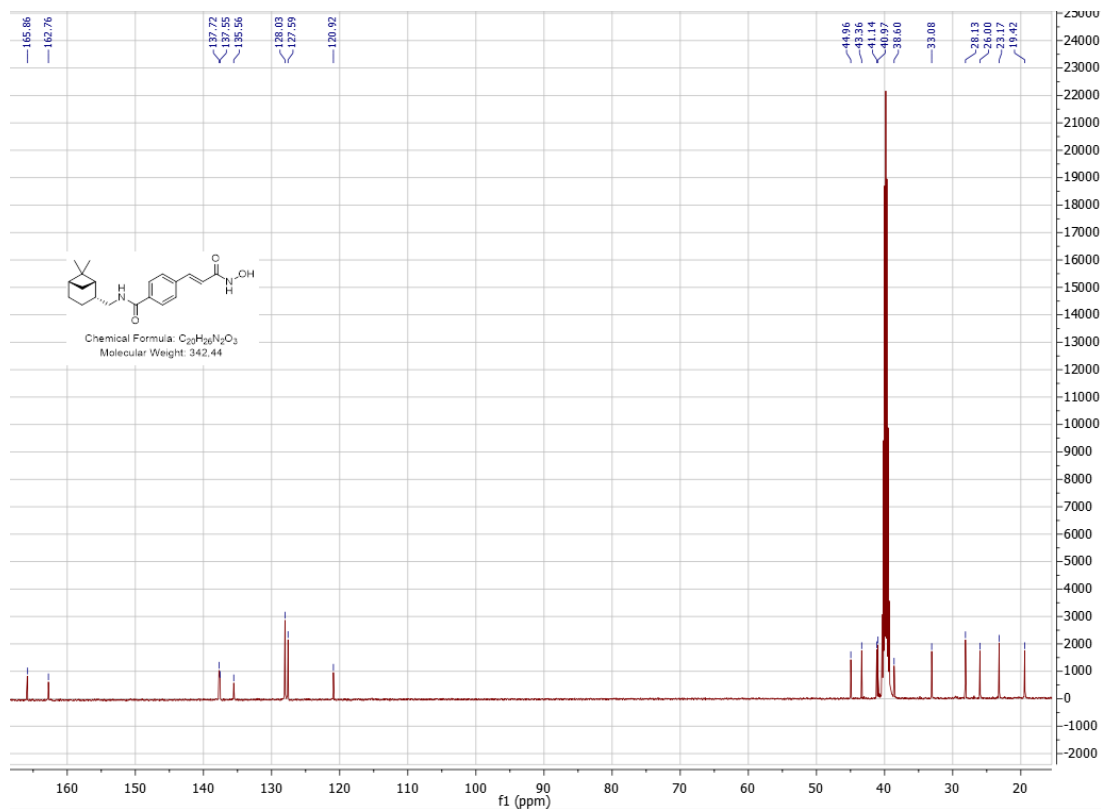

### Mass-spectrum of compound **38c**

maa-588a #8 RT: 0.52 AV: 1 NL: 6.33E6  
T: + c EI Full ms [ 14.50-370.50]

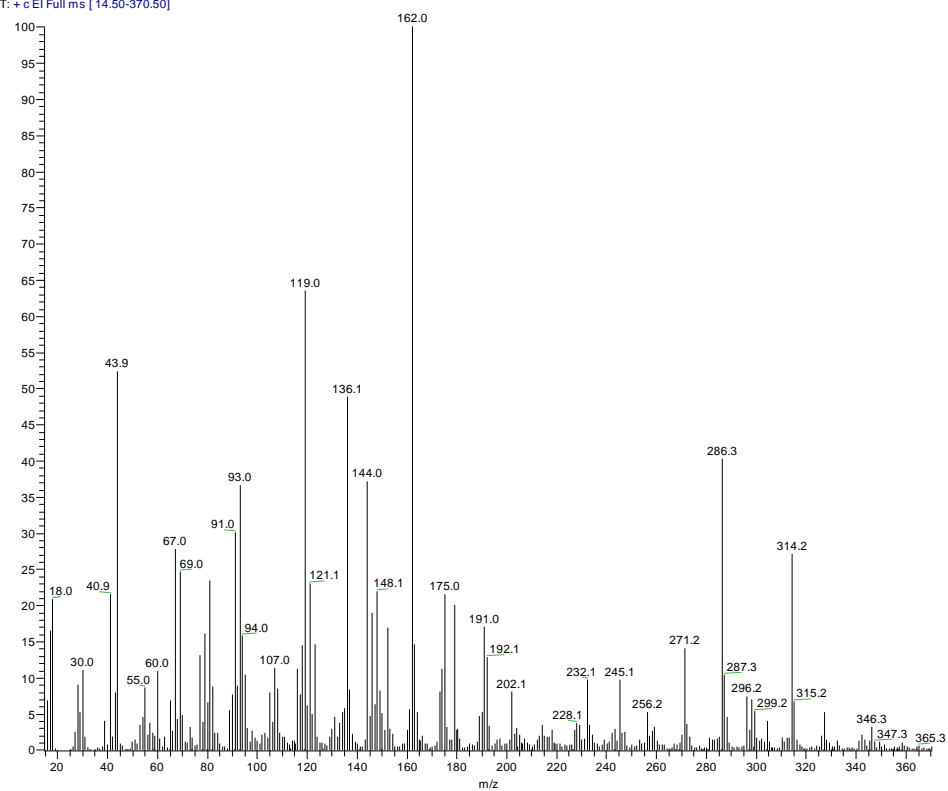

Table S1. Molecular docking of hydroxamic acids against HDAC6 (PDB ID: 5EDU) Hydrogen bonds are shown in the “H-bonds” column. Other interaction between peptide and ligand are shown in the “Other int-s”.

| Compound              | H-bonds              | Other interactions                              | Docking Score | IC <sub>50</sub> , $\mu$ M |
|-----------------------|----------------------|-------------------------------------------------|---------------|----------------------------|
| <b>Trichostatin A</b> | HIS610               | $\pi$ - $\pi$ stacking: HIE500                  | -8.798        |                            |
| <b>31</b>             | SER568 HIS610 TYR782 | ---                                             | -9.547        | 0.66                       |
| <b>30</b>             | SER568 GLY619 TYR782 | ---                                             | -8.662        | 0.61                       |
| <b>35a</b>            | HIE500 SER568 TYR782 | $\pi$ - $\pi$ stacking: PHE620<br>HIE651        | -8.120        | 3.87                       |
| <b>38b</b>            | SER568               | $\pi$ - $\pi$ stacking: PHE680                  | -7.125        | 4.81                       |
| <b>38a</b>            | GLY619               | $\pi$ - $\pi$ stacking: PHE680                  | -6.886        | 7.74                       |
| <b>35b</b>            | HIE500 SER568 TYR782 | $\pi$ - $\pi$ stacking: HIE500<br>PHE680        | -6.689        | 8.23                       |
| <b>35c</b>            | SER568 GLY619        | $\pi$ - $\pi$ stacking: PHE620<br>HIE651 PHE680 | -6.445        | 6.90                       |
| <b>38c</b>            | TYR782               | ---                                             | -6.210        | 8.03                       |

Table S2. Results of docking procedures of molecules to the  $\beta$ -amyloid peptide (PDB ID: 1IYT). “C-term” corresponds to the C-terminus of the peptide (amino acids from 3 to 12, “N-term” corresponds to the fold in the vicinity of the N-terminus (amino acids from 22 to 30). Preferred position indicates the binding pocket with lower  $\Delta G$  MM-GBSA.  $\Delta G$  MM-GBSA is measured in kcal/mol. Hydrogen bonds are shown in the “H-bonds” columns. Other interaction between the  $\beta$ -amyloid and ligands are shown in the “Other int-s” columns.

| Compound   | Preferred position | $\Delta G$ bind <sub>pref.</sub><br>pos (MM-GBSA) | H-bonds<br>(C-term)    | Other int-s<br>(C-term)                     | H-bonds<br>(N-term)              | Other int-s<br>(N-term) | $\Delta G$ C-term (MM-GBSA) | $\Delta G$ N-term (MM-GBSA) | Statistical distribution<br>C-term:N-term (T = 298 K) |
|------------|--------------------|---------------------------------------------------|------------------------|---------------------------------------------|----------------------------------|-------------------------|-----------------------------|-----------------------------|-------------------------------------------------------|
| <b>35b</b> | C-term             | -45.66                                            | HIE6<br>GLU11          | $\pi$ - $\pi$<br>stacking:<br>TYR10<br>PHE4 | ALA21<br>GLU22<br>SER26<br>LYS28 | --                      | -45.66                      | -42.01                      | 480:1                                                 |
| <b>38a</b> | C-term             | -44.7                                             | GLU3<br>ASP7<br>GLU 11 | $\pi$ - $\pi$<br>stacking:<br>TYR10         | ALA21<br>GLU22<br>SER26          | --                      | -44.7                       | -42.13                      | 77:1                                                  |

|            |        |        |                        |                                     |                         |    |        |        |          |
|------------|--------|--------|------------------------|-------------------------------------|-------------------------|----|--------|--------|----------|
| <b>35c</b> | N-term | -43.57 | GLU3<br>ASP7<br>GLU 11 | $\pi$ - $\pi$<br>stacking:<br>TYR10 | GLU22<br>GLY25<br>SER26 | -- | -38.89 | -43.57 | 1:2700   |
| <b>38b</b> | N-term | -41.05 | GLU 11                 | $\pi$ - $\pi$<br>stacking:<br>TYR10 | ALA21<br>GLU22<br>LYS28 | -- | -37.84 | -41.05 | 1:230    |
| <b>38c</b> | C-term | -40.19 | ASP7<br>GLU11          | $\pi$ - $\pi$<br>stacking:<br>TYR10 | GLU22<br>LYS28          | -- | -40.19 | -32.74 | 290000:1 |
| <b>35a</b> | C-term | -38.14 | GLU11<br>GIE14         | $\pi$ - $\pi$<br>stacking:<br>TYR10 | ALA21<br>GLU22<br>LYS28 | -- | -38.14 | -36.54 | 15:1     |
